# Supplementary material for: Effects of adatom species on the structure, stability, and work function of adatom-α-borophene nanocomposites
Source: Royal Society of Chemistry journal article supplement (doi:10.1039/d2cp00506a), 2022-01-01
Supplement: d2cp00506a1.pdf [file d2cp00506a1.pdf]

## Supplementary Information for:

# Effect of adatom species on structure, stability, and work function of adatom- $\alpha$ -borophene nanocomposites

Jing He,<sup>a</sup> Bing Zheng,<sup>\*a</sup> Ying Xie,<sup>a</sup> Yin-yin Qian,<sup>a</sup> Jiao Zhang,<sup>a</sup> Ke Wang,<sup>a</sup> Lin Yang,<sup>bc</sup> and Hai-tao Yu<sup>\*a</sup>

<sup>a</sup>Key Laboratory of Functional Inorganic Material Chemistry (Ministry of Education) and School of Chemistry and Materials Science, Heilongjiang University, Harbin 150080, P. R. China. E-mail: zhengbing0106@163.com, yuhaitao@hlju.edu.cn

<sup>b</sup>National Key Laboratory of Science and Technology on Advanced Composites in Special Environments, Center for Composite Materials and Structures, Harbin Institute of Technology, Harbin 150080, P. R. China

<sup>c</sup>School of Aerospace, Mechanical and Mechatronic Engineering, The University of Sydney, Sydney, NSW 2006, Australia

## Contents of the Supporting Information:

### S1 Calculation details

S1.1 Calculating details of induced dipole moment

S1.2 Calculating details of dipole moment

### S2 Tables

**Table S1** Work functions of graphene, silicene, BN-sheet, and borophene before and after atom adsorption in previous studies.  $\phi$  (eV) and  $\phi_A$  (eV) are the work functions of a 2D material before and after adsorption, respectively.  $\Delta\phi$  (eV) refers to the variation of the work function by adsorption.

**Table S2** Migration pathways of M adatoms and corresponding energy barriers (eV) for different adatoms on BBP or other 2D materials in this study and previous studies. H1, F1, B1, and T1 are the equilibrium adsorption sites on the corresponding 2D material. H2, F2, and T2 are the other adsorption sites.

**Table S3** Average M–B bond lengths ( $\text{\AA}$ ) and average bond angles ( $\angle B_mMB_o$ , degree) in M/BBP (M = Li, Na, K, Rb, Cs, Be, Mg, Ca, Sr, Ba, F, Cl, Br, and I) before and after NVT-molecular dynamics (NVT-MD) simulations (3 ps).  $B_m$  and  $B_o$  are two o-position boron atoms in a hexagonal hole nearest to the adatom in BBP, whereas the M in  $\angle B_mMB_o$  is M atom decorated on the abovementioned (filled) hexagonal hole.

**Table S4** Calculated binding energy of M/BBP ( $E_b$ , eV), relative torsion energy of the BBP substrate ( $\Delta E_{\text{BBP}}$ , eV), and interaction energy between the adsorbed M atoms and BBP' in optimized M/BBP models ( $E_{\text{M-BBP'}}$ , eV).

**Table S5** Calculated M–B bond populations of M/BBP systems.

### S3 Figures

**Fig. S1** Work function of Cs/BBP as a function of plane-to-plane (BBP) distance ( $d$ ). Cyan and thistle spheres represent boron and caesium atoms, respectively.

**Fig. S2** Optimized BBP structures containing one lithium atom.

**Fig. S3** Optimized BBP structures containing one sodium atom.

**Fig. S4** Optimized BBP structures containing one potassium atom.

**Fig. S5** Optimized BBP structures containing one rubidium atom.

**Fig. S6** Optimized BBP structures containing one caesium atom.

**Fig. S7** Optimized BBP structures containing one beryllium atom.

**Fig. S8** Optimized BBP structures containing one magnesium atom.

**Fig. S9** Optimized BBP structures containing one calcium atom.

**Fig. S10** Optimized BBP structures containing one strontium atom.

**Fig. S11** Optimized BBP structures containing one barium atom.

**Fig. S12** Optimized BBP structures containing one fluorine atom.

**Fig. S13** Optimized BBP structures containing one chlorine atom.

**Fig. S14** Optimized BBP structures containing one bromine atom.

**Fig. S15** Optimized BBP structures containing one iodine atom.

**Fig. S16** Constant-T simulation of alkali metal/BBP using the Nosé-Hoover chain thermostat, with a time step of 1.5 fs, target temperature of 300 K, and nose Q ratio of 2.0. (a)–(e) show the potential energies of Li/BBP, Na/BBP, K/BBP, Rb/BBP, and Cs/BBP at each time step of the simulation within 3 ps, respectively.

**Fig. S17** Constant-T simulation of alkaline earth metal/BBP using the Nosé-Hoover chain thermostat, with a time step of 1.5 fs, target temperature of 300 K, and nose Q ratio of 2.0. (a)–(e) show the potential energies of Be/BBP, Mg/BBP, Ca/BBP, Sr/BBP, and Ba/BBP at each time step of the simulation within 3 ps, respectively.

**Fig. S18** Constant-T simulation of halogen/BBP using the Nosé-Hoover chain thermostat, with a time step of 1.5 fs, target temperature of 300 K, and nose Q ratio of 2.0. (a)–(d) show the potential energies of F/BBP, Cl/BBP, Br/BBP, and I/BBP at each time step of the simulation within 3 ps, respectively.

**Fig. S19** Hirshfeld charges of adatom (M), NB, and RB in (a) alkali metal/BBP and (b) alkaline earth metal/BBP as a function of ionization potential (IP). (c) Hirshfeld charges of M, NB, and the sum of RB and SNB (RB+SNB) in halogen/BBP as a function of electronegativity ( $\chi$ ).

**Fig. S20** Electron density differences for (a) F/BBP, (b) Cl/BBP, (c) Br/BBP, (d) I/BBP, and (e) diagram of M and two boron atoms used to determine the indicated slice aMb.

**Fig. S21** (a) PDOSs of the s, p, and d orbitals of alkaline earth metal atoms before adsorption. (b) PDOSs of the s, p, and d orbitals of alkaline earth metal atoms after adsorption. (c) PDOSs of the s, p, and d orbitals of boron atoms of alkaline earth metal/BBP before and after adsorption.

**Fig. S22** (a) PDOSs of the s, p, and d orbitals of halogen atoms before adsorption. (b) PDOSs of the s, p and, d orbitals of halogen atoms after adsorption. (c) PDOSs of the s, p, and d orbitals of boron atoms of halogen/BBP before and after adsorption.

# S1 Calculation details

## S1.1 Calculating details of induced dipole moment:

The dipole moment  $p(A)$  at the surface induced by the adatoms (M) can be defined as

$$p(A) = p(M/BBP) - p(BBP) - p(M) \quad (S1)$$

where  $p(M/BBP)$ ,  $p(BBP)$ , and  $p(M)$  represent the dipole moments of M/BBP, the BBP substrate, and the adatoms, respectively.



## S1.2 Calculating details of dipole moment:

Dipole moment vector of M/BBP ( $\mu_{M/BBP}$ ) can be obtained by the following formula

$$\sum_{a=1}^n q_{M/BBP,a} r_{M/BBP,a} \quad (S2)$$

where  $q_{M/BBP,a}$  refers to the partial charge of atom a in M/BBP, while  $r_{M/BBP,a}$  represents the position vector of atom a in M/BBP.

## S2 Tables

**Table S1** Work functions of graphene, silicene, BN-sheet, and borophene before and after atom adsorption in previous studies.  $\phi$  (eV) and  $\phi_A$  (eV) are the work functions of a 2D material before and after adsorption, respectively.  $\Delta\phi$  (eV) refers to the variation of the work function by adsorption.

| Adatom | Material | $\phi$ | $\phi_A$    | $\Delta\phi$  | Functional       |
|--------|----------|--------|-------------|---------------|------------------|
| Li     | graphene | 4.26   | 2.72        | -1.54         | PBE <sup>1</sup> |
| Na     | graphene | 4.26   | 2.21        | -2.05         | PBE <sup>1</sup> |
| K      | graphene | 4.26   | 1.49        | -2.77         | PBE <sup>1</sup> |
| Ca     | graphene | 4.26   | 3.18        | -1.08         | PBE <sup>1</sup> |
| Al     | graphene | 4.26   | 3.08        | -1.18         | PBE <sup>1</sup> |
| Ga     | graphene | 4.26   | 2.66        | -1.60         | PBE <sup>1</sup> |
| In     | graphene | 4.26   | 2.34        | -1.92         | PBE <sup>1</sup> |
| Sn     | graphene | 4.26   | 3.81        | -0.45         | PBE <sup>1</sup> |
| Ti     | graphene | 4.26   | 3.16        | -1.10         | PBE <sup>1</sup> |
| Fe     | graphene | 4.26   | 3.24        | -1.02         | PBE <sup>1</sup> |
| Pd     | graphene | 4.26   | 3.61        | -0.65         | PBE <sup>1</sup> |
| Au     | graphene | 4.26   | 4.88        | 0.62          | PBE <sup>1</sup> |
| Li     | graphene | 4.38   | 2.57 ~ 3.53 | -1.81 ~ -0.85 | PBE <sup>2</sup> |
| Na     | graphene | 4.38   | 2.45 ~ 3.34 | -1.93 ~ -1.04 | PBE <sup>2</sup> |
| K      | graphene | 4.38   | 2.23 ~ 3.22 | -2.15 ~ -1.16 | PBE <sup>2</sup> |
| Rb     | graphene | 4.38   | 2.20 ~ 3.15 | -2.18 ~ -1.23 | PBE <sup>2</sup> |
| Cs     | graphene | 4.38   | 2.06 ~ 3.04 | -2.32 ~ -1.34 | PBE <sup>2</sup> |
| Ca     | graphene | 4.38   | 2.91 ~ 3.46 | -1.47 ~ -0.92 | PBE <sup>2</sup> |
| Sr     | graphene | 4.38   | 2.84 ~ 3.38 | -1.54 ~ -0.10 | PBE <sup>2</sup> |
| Al     | graphene | 4.38   | 3.06 ~ 3.62 | -1.81 ~ -0.85 | PBE <sup>2</sup> |
| Ti     | graphene | 4.38   | 3.10 ~ 3.73 | -1.28 ~ -0.65 | PBE <sup>2</sup> |
| N      | graphene | 4.38   | 4.70 ~ 5.20 | 0.32 ~ 0.82   | PBE <sup>3</sup> |
| P      | graphene | 4.38   | 4.60 ~ 4.80 | 0.22 ~ 0.42   | PBE <sup>3</sup> |
| As     | graphene | 4.38   | 4.50 ~ 4.78 | 0.12 ~ 0.42   | PBE <sup>3</sup> |
| O      | graphene | 4.38   | 4.80 ~ 4.90 | 0.42 ~ 0.52   | PBE <sup>3</sup> |
| S      | graphene | 4.38   | 4.50 ~ 4.75 | 0.12 ~ 0.32   | PBE <sup>3</sup> |
| Se     | graphene | 4.38   | 4.50 ~ 4.74 | 0.12 ~ 0.42   | PBE <sup>3</sup> |
| F      | graphene | 4.38   | 4.80 ~ 5.30 | 0.42 ~ 0.92   | PBE <sup>3</sup> |
| Cl     | graphene | 4.38   | 5.20 ~ 5.76 | 0.82 ~ 1.42   | PBE <sup>3</sup> |

To be continued.

| Adatom | Material                    | $\phi$ | $\phi_A$    | $\Delta\phi$  | Functional          |
|--------|-----------------------------|--------|-------------|---------------|---------------------|
| Br     | graphene                    | 4.38   | 5.00 ~ 5.71 | 0.62 ~ 1.32   | PBE <sup>3</sup>    |
| I      | graphene                    | 4.38   | 5.00 ~ 5.70 | 0.62 ~ 1.32   | PBE <sup>3</sup>    |
| F      | silicene                    | 4.59   | 5.85        | 1.26          | PBE <sup>4</sup>    |
| Cl     | silicene                    | 4.59   | 5.35        | 0.76          | PBE <sup>4</sup>    |
| Br     | silicene                    | 4.59   | 5.17        | 0.58          | PBE <sup>4</sup>    |
| I      | silicene                    | 4.59   | 4.91        | 0.32          | PBE <sup>4</sup>    |
| K      | BN-sheet                    | 2.85   | 0.98        | -1.87         | PWGGA <sup>5</sup>  |
| Na     | BN-sheet                    | 2.85   | 1.76        | -1.09         | PWGGA <sup>5</sup>  |
| Li     | BN-sheet                    | 2.85   | 1.93        | -0.92         | PWGGA <sup>5</sup>  |
| Ca     | BN-sheet                    | 2.85   | 2.15        | -0.70         | PWGGA <sup>5</sup>  |
| Mg     | BN-sheet                    | 2.85   | 2.67        | -0.18         | PWGGA <sup>5</sup>  |
| Be     | BN-sheet                    | 2.85   | 3.19        | 0.34          | PWGGA <sup>5</sup>  |
| Li     | $\alpha$ -borophene         | 4.16   | 3.67 ~ 2.31 | -0.49 ~ -1.85 | PW91 <sup>6</sup>   |
| Li     | 2-layer $\alpha$ -borophene | 4.65   | 4.46 ~ 1.96 | -0.19 ~ -2.69 | PBE <sup>7</sup>    |
| Li     | $\alpha_1$ -borophene       | 4.19   | 3.61 ~ 1.58 | -0.58 ~ -2.61 | PW91 <sup>8</sup>   |
| Na     | $\alpha_1$ -borophene       | 4.19   | 3.38 ~ 1.17 | -0.81 ~ -3.02 | PW91 <sup>8</sup>   |
| K      | $\alpha_1$ -borophene       | 4.19   | 3.07 ~ 0.68 | -1.12 ~ -3.51 | PW91 <sup>8</sup>   |
| Cs     | $\alpha$ -borophene         | 4.16   | 3.05 ~ 0.11 | -1.11 ~ -4.04 | PW91 <sup>9</sup>   |
| F      | $\alpha$ -borophene         | 4.14   | 5.36 ~ 7.78 | 1.22 ~ 3.64   | PBE <sup>10</sup>   |
| H      | $\delta_6$ -borophene       | 5.31   | 5.88        | 0.57          | HSE06 <sup>11</sup> |
| Li     | germanene                   | -      | 3.86        | -             | PBE <sup>12</sup>   |
| Na     | germanene                   | -      | 3.59        | -             | PBE <sup>12</sup>   |
| K      | germanene                   | -      | 3.27        | -             | PBE <sup>12</sup>   |
| Be     | germanene                   | -      | 4.59        | -             | PBE <sup>12</sup>   |
| Mg     | germanene                   | -      | 4.39        | -             | PBE <sup>12</sup>   |
| Ca     | germanene                   | -      | 3.58        | -             | PBE <sup>12</sup>   |
| Al     | germanene                   | -      | 4.37        | -             | PBE <sup>12</sup>   |
| Ga     | germanene                   | -      | 4.08        | -             | PBE <sup>12</sup>   |
| In     | germanene                   | -      | 3.71        | -             | PBE <sup>12</sup>   |
| Ti     | germanene                   | -      | 4.98        | -             | PBE <sup>12</sup>   |
| V      | germanene                   | -      | 5.12        | -             | PBE <sup>12</sup>   |
| Cr     | germanene                   | -      | 4.84        | -             | PBE <sup>12</sup>   |
| Fe     | germanene                   | -      | 4.65        | -             | PBE <sup>12</sup>   |
| Co     | germanene                   | -      | 4.75        | -             | PBE <sup>12</sup>   |
| Ni     | germanene                   | -      | 4.34        | -             | PBE <sup>12</sup>   |
| F      | 2-layer graphene            | 4.44   | 5.32        | 0.79          | Exp. <sup>13</sup>  |
| F      | 4-layer graphene            | 4.39   | 4.43 ~ 5.13 | 0.04 ~ 0.74   | Exp. <sup>14</sup>  |

**Table S2** Migration pathways of M adatoms and corresponding energy barriers (eV) for different adatoms on BBP or other 2D materials in this study and previous studies. H1, F1, B1, and T1 are the equilibrium adsorption sites on the corresponding 2D material. H2, F2, and T2 are the other adsorption sites.

| Structure                               | Migration pathway | Energy barrier | Ref       |
|-----------------------------------------|-------------------|----------------|-----------|
| Li/BBP                                  | H1 → H2           | 0.28           | this work |
| Na/BBP                                  | H1 → H2           | 0.28           | this work |
| K/BBP                                   | H1 → H2           | 0.16           | this work |
| Rb/BBP                                  | H1 → H2           | 0.10           | this work |
| Cs/BBP                                  | H1 → H2           | 0.07           | this work |
| Be/BBP                                  | H1 → H2           | — <sup>a</sup> | this work |
| Mg/BBP                                  | H1 → H2           | 1.90           | this work |
| Ca/BBP                                  | H1 → H2           | 0.01           | this work |
| Sr/BBP                                  | H1 → H2           | 0.14           | this work |
| Ba/BBP                                  | F1 → H2           | 0.00           | this work |
| F/BBP                                   | F1 → F2           | 1.96           | this work |
| Cl/BBP                                  | F1 → F2           | 1.30           | this work |
| Br/BBP                                  | F1 → F2           | 1.02           | this work |
| I/BBP                                   | F1 → F2           | 0.04           | this work |
| Li/ $\alpha$ -borophene                 | H1 → H2           | 0.21           | Ref. 6    |
| Na <sup>+</sup> / $\delta_6$ -borophene | B1 → F2           | 0.22           | Ref. 15   |
| Na/graphene                             | B1 → H2           | 0.10           | Ref. 1    |
| K/graphene                              | B1 → H2           | 0.10           | Ref. 1    |
| Cs/ $\alpha$ -borophene                 | H1 → H2           | 0.43           | Ref. 9    |
| Be/BN-sheet                             | B1 → H2           | <1             | Ref. 5    |
| Ca/graphene                             | T1 → H2           | 0.12           | Ref. 16   |
| Sr/BN-sheet                             | B1 → H2           | <1             | Ref. 5    |
| Ba/BN-sheet                             | B1 → H2           | <1             | Ref. 5    |
| F/ $\delta_6$ -borophene                | T1 → T2           | 1.26           | Ref. 17   |

<sup>a</sup> unavailable data.

**Table S3** Average M–B bond lengths ( $\text{\AA}$ ) and average bond angles ( $\angle B_mMB_o$ , degree) in M/BBP (M = Li, Na, K, Rb, Cs, Be, Mg, Ca, Sr, Ba, F, Cl, Br, and I) before and after NVT-molecular dynamics (NVT-MD) simulations (3 ps).  $B_m$  and  $B_o$  are two o-position boron atoms in a hexagonal hole nearest to the adatom in BBP, whereas the M in  $\angle B_mMB_o$  is M atom decorated on the abovementioned (filled) hexagonal hole.

(a)

|                                         | Li/BBP | Na/BBP | K/BBP  | Rb/BBP | Cs/BBP | Be/BBP | Mg/BBP |
|-----------------------------------------|--------|--------|--------|--------|--------|--------|--------|
| Average M–B bond length                 |        |        |        |        |        |        |        |
| Before NVT-MD                           | 2.345  | 2.752  | 3.132  | 3.657  | 3.508  | 1.903  | 2.592  |
| After NVT-MD                            | 2.315  | 2.719  | 3.153  | 3.719  | 3.524  | 1.9178 | 2.550  |
| Variety                                 | –1.28% | –1.19% | 0.66%  | 1.70%  | 0.46%  | 0.74%  | –1.62% |
| Average bond angle ( $\angle B_mMB_o$ ) |        |        |        |        |        |        |        |
| Before NVT-MD                           | 42.021 | 35.570 | 31.106 | 26.554 | 27.699 | 53.430 | 38.294 |
| After NVT-MD                            | 42.690 | 36.109 | 31.054 | 26.711 | 28.160 | 53.461 | 38.794 |
| Variety                                 | 1.59%  | 1.52%  | –0.17% | 0.59%  | 1.67%  | 0.06%  | 1.31%  |

(b)

|                                         | Ca/BBP | Sr/BBP | Ba/BBP | F/BBP  | Cl/BBP | Br/BBP | I/BBP  |
|-----------------------------------------|--------|--------|--------|--------|--------|--------|--------|
| Average M–B bond length                 |        |        |        |        |        |        |        |
| Before NVT-MD                           | 2.718  | 2.846  | 3.001  | 2.858  | 3.226  | 3.374  | 3.575  |
| After NVT-MD                            | 2.735  | 2.891  | 3.008  | 2.851  | 3.245  | 3.422  | 3.645  |
| Variety                                 | 0.63%  | 1.58%  | 0.22%  | 1.14%  | 0.57%  | 1.43%  | 1.95%  |
| Average bond angle ( $\angle B_mMB_o$ ) |        |        |        |        |        |        |        |
| Before NVT-MD                           | 36.401 | 34.612 | 32.719 | 33.674 | 29.701 | 28.385 | 26.759 |
| After NVT-MD                            | 36.244 | 34.563 | 33.327 | 34.134 | 30.231 | 28.833 | 26.988 |
| Variety                                 | –0.43% | –0.14% | 1.86%  | 1.37%  | 1.78%  | 1.58%  | 0.86%  |

**Table S4** Calculated binding energy of M/BBP ( $E_b$ , eV), relative torsion energy of the BBP substrate ( $\Delta E_{BBP}$ , eV), and interaction energy between the adsorbed M atoms and BBP' in optimized M/BBP models ( $E_{M-BBP'}$ , eV).

| Structure | $E_b$ | $\Delta E_{BBP}$ | $E_{M-BBP'}$ |
|-----------|-------|------------------|--------------|
| Li/BBP    | 2.321 | -0.054           | 2.375        |
| Na/BBP    | 1.642 | -0.035           | 1.677        |
| K/BBP     | 2.063 | -0.034           | 2.098        |
| Rb/BBP    | 2.238 | -0.043           | 2.282        |
| Cs/BBP    | 2.660 | -0.049           | 2.709        |
| Be/BBP    | 2.805 | -0.306           | 3.112        |
| Mg/BBP    | 0.810 | -0.784           | 1.594        |
| Ca/BBP    | 2.161 | -0.698           | 2.860        |
| Sr/BBP    | 2.864 | -0.623           | 3.488        |
| Ba/BBP    | 4.197 | -0.383           | 4.581        |
| F/BBP     | 5.327 | -0.884           | 6.212        |
| Cl/BBP    | 3.300 | -0.889           | 4.190        |
| Br/BBP    | 2.592 | -0.825           | 3.418        |
| I/BBP     | 1.959 | -0.804           | 2.763        |

**Table S5** Calculated M–B bond populations of M/BBP systems.

| Structure | M–B bond population |       |       |       |       |       |       |
|-----------|---------------------|-------|-------|-------|-------|-------|-------|
|           | M–B1                | M–B2  | M–B3  | M–B4  | M–B5  | M–B6  | M–B7  |
| Li/BBP    | –0.01               | –0.01 | –0.01 | –0.01 | –0.01 | –0.01 | –     |
| Na/BBP    | –0.08               | –0.12 | –0.13 | –0.13 | –0.08 | –0.12 | –     |
| K/BBP     | –0.11               | –0.11 | –0.11 | –0.11 | –0.11 | –0.11 | –     |
| Rb/BBP    | –0.12               | –0.12 | –0.12 | –0.11 | –0.12 | –0.11 | –     |
| Cs/BBP    | –0.12               | –0.12 | –0.16 | –0.12 | –0.15 | –0.11 | –     |
| Be/BBP    | 0.38                | 0.07  | 0.08  | 0.08  | 0.38  | 0.07  | –     |
| Mg/BBP    | 0.06                | –0.20 | –0.20 | –0.20 | 0.05  | –0.20 | –0.13 |
| Ca/BBP    | –0.23               | –0.13 | –0.33 | –0.33 | –0.23 | –0.13 | 0.03  |
| Sr/BBP    | 0.04                | –0.03 | –0.11 | –0.11 | 0.04  | 0.03  | 0.20  |
| Ba/BBP    | 0.01                | –0.02 | –0.02 | –0.03 | –0.03 | 0.01  | –0.26 |
| F/BBP     | 0.61                | –     | –     | –     | –     | –     | –     |
| Cl/BBP    | 0.76                | –     | –     | –     | –     | –     | –     |
| Br/BBP    | 0.67                | –     | –     | –     | –     | –     | –     |
| I/BBP     | 0.67                | –     | –     | –     | –     | –     | –     |

## S3 Figures

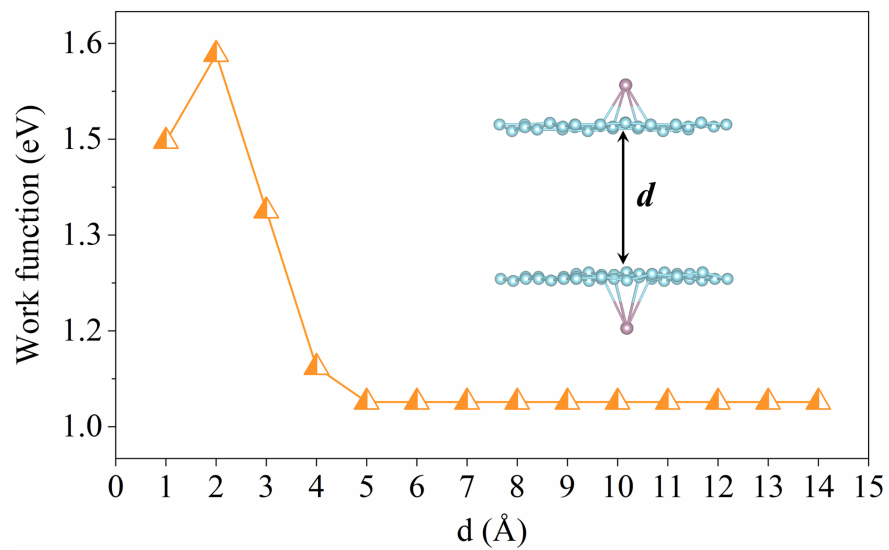

**Fig. S1** Work function of Cs/BBP as a function of plane-to-plane (BBP) distance ( $d$ ). Cyan and thistle spheres represent boron and caesium atoms, respectively.



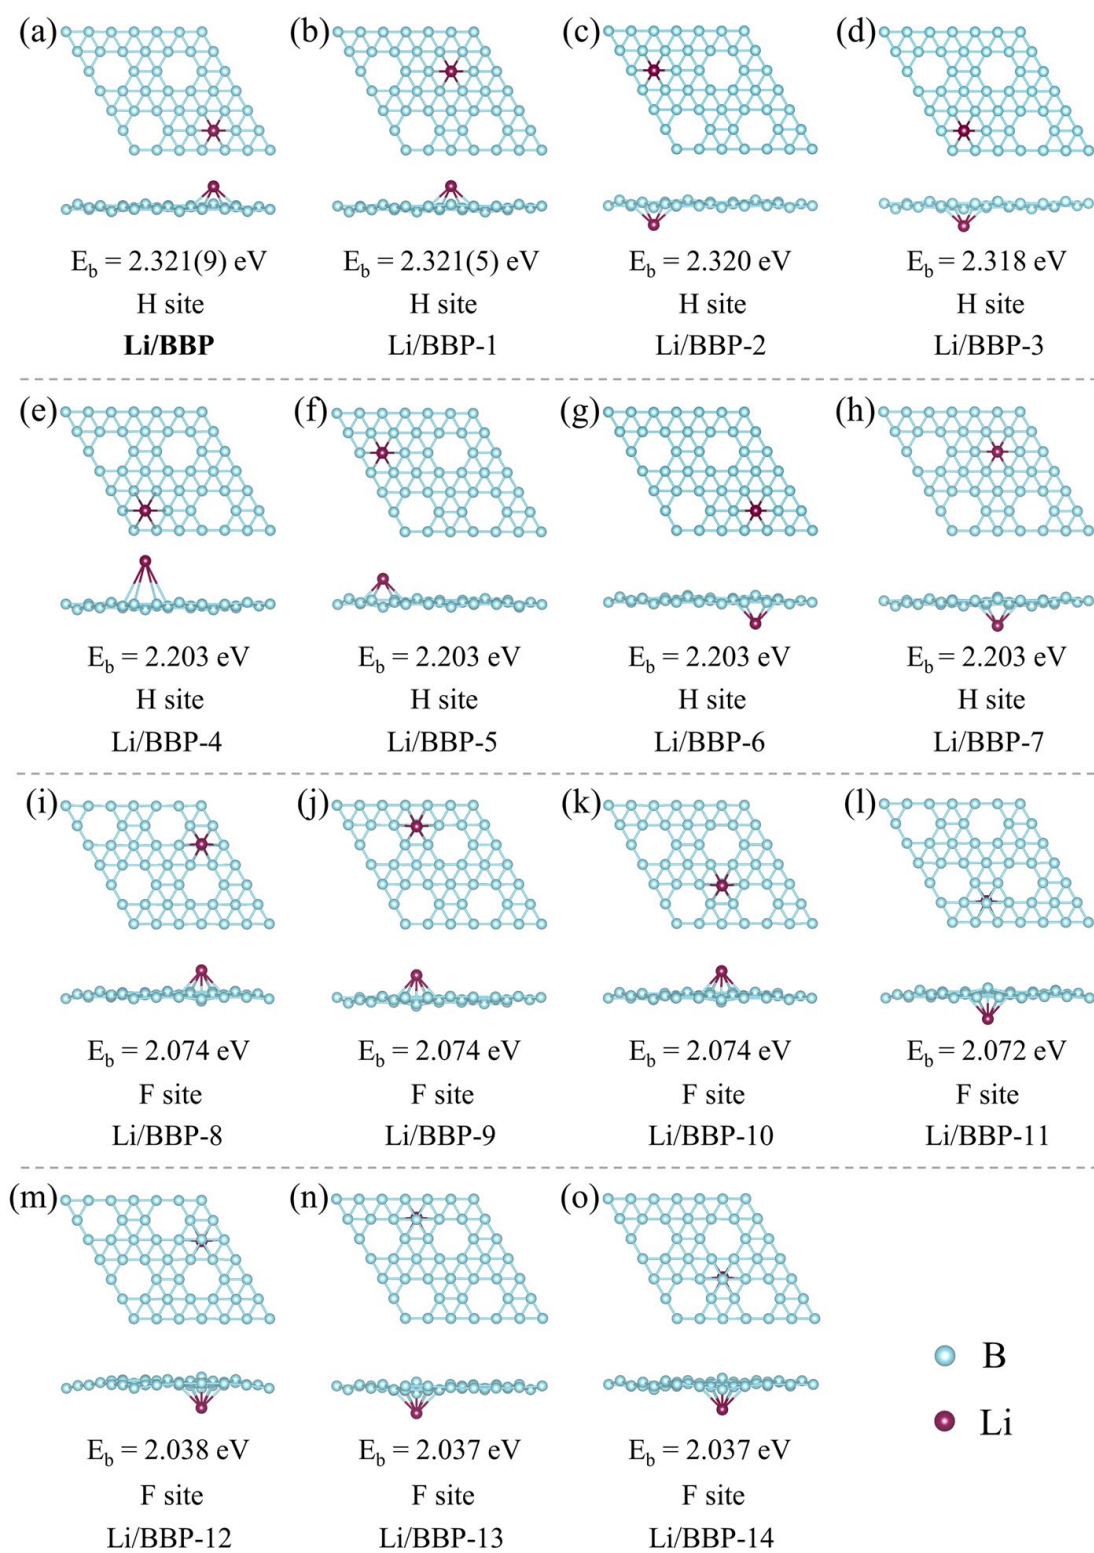

**Fig. S2** Optimized BBP structures containing one lithium atom.

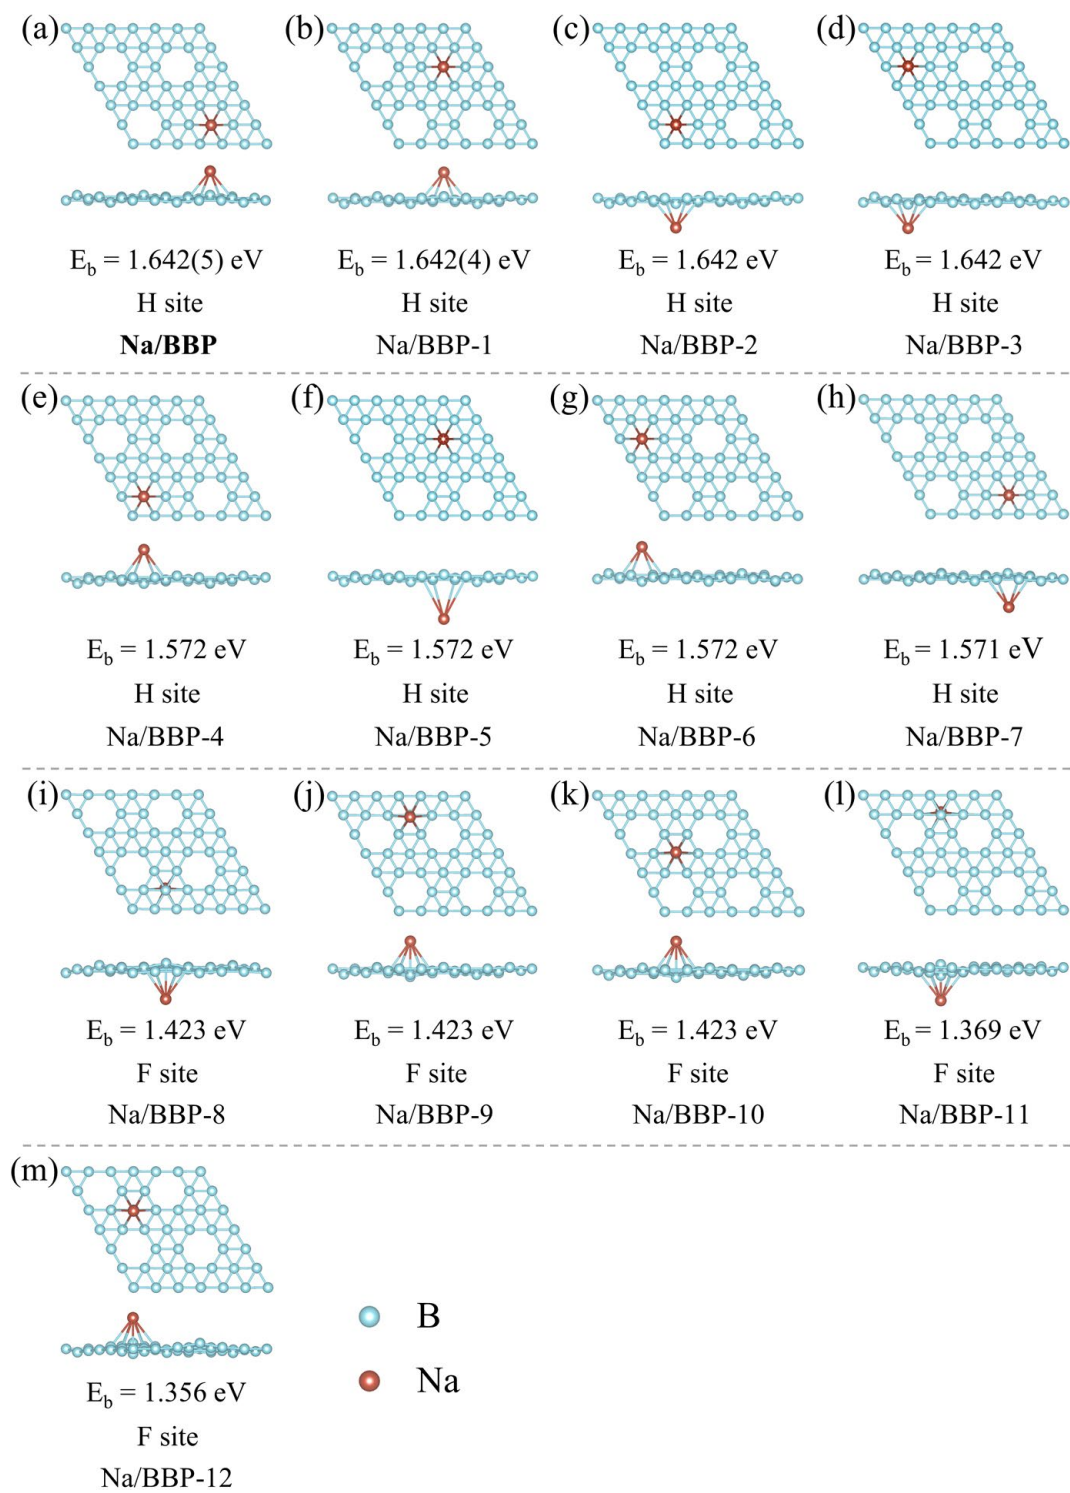

**Fig. S3** Optimized BBP structures containing one sodium atom.

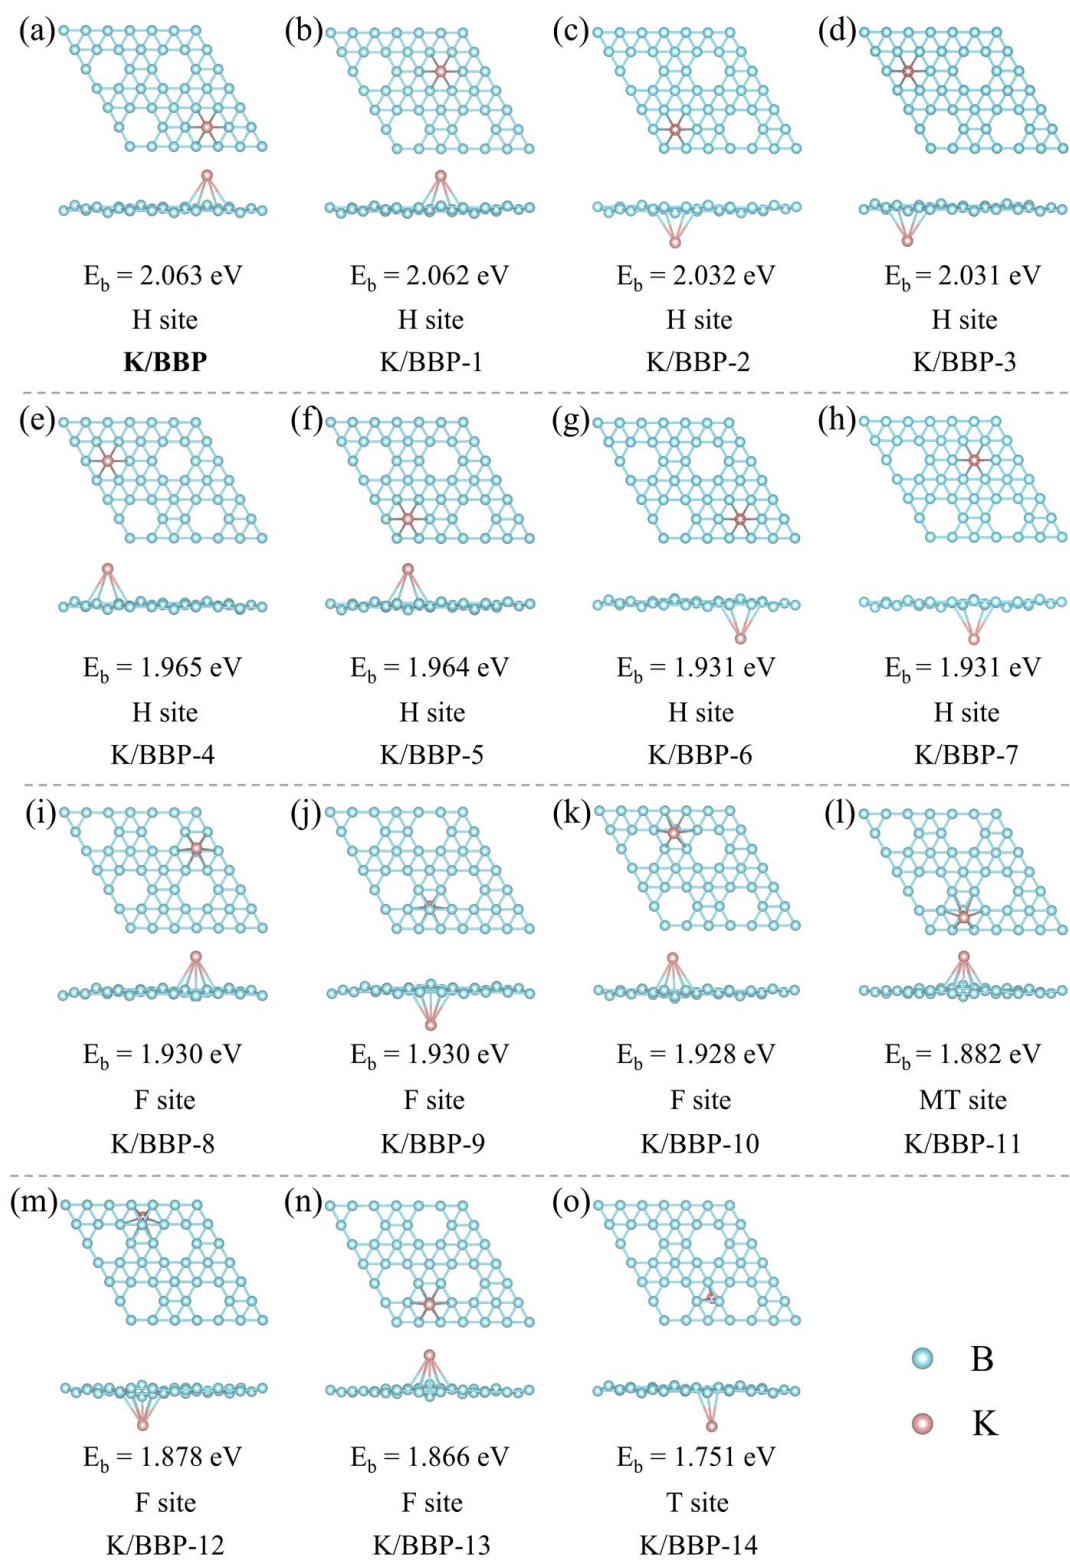

**Fig. S4** Optimized BBP structures containing one potassium atom.



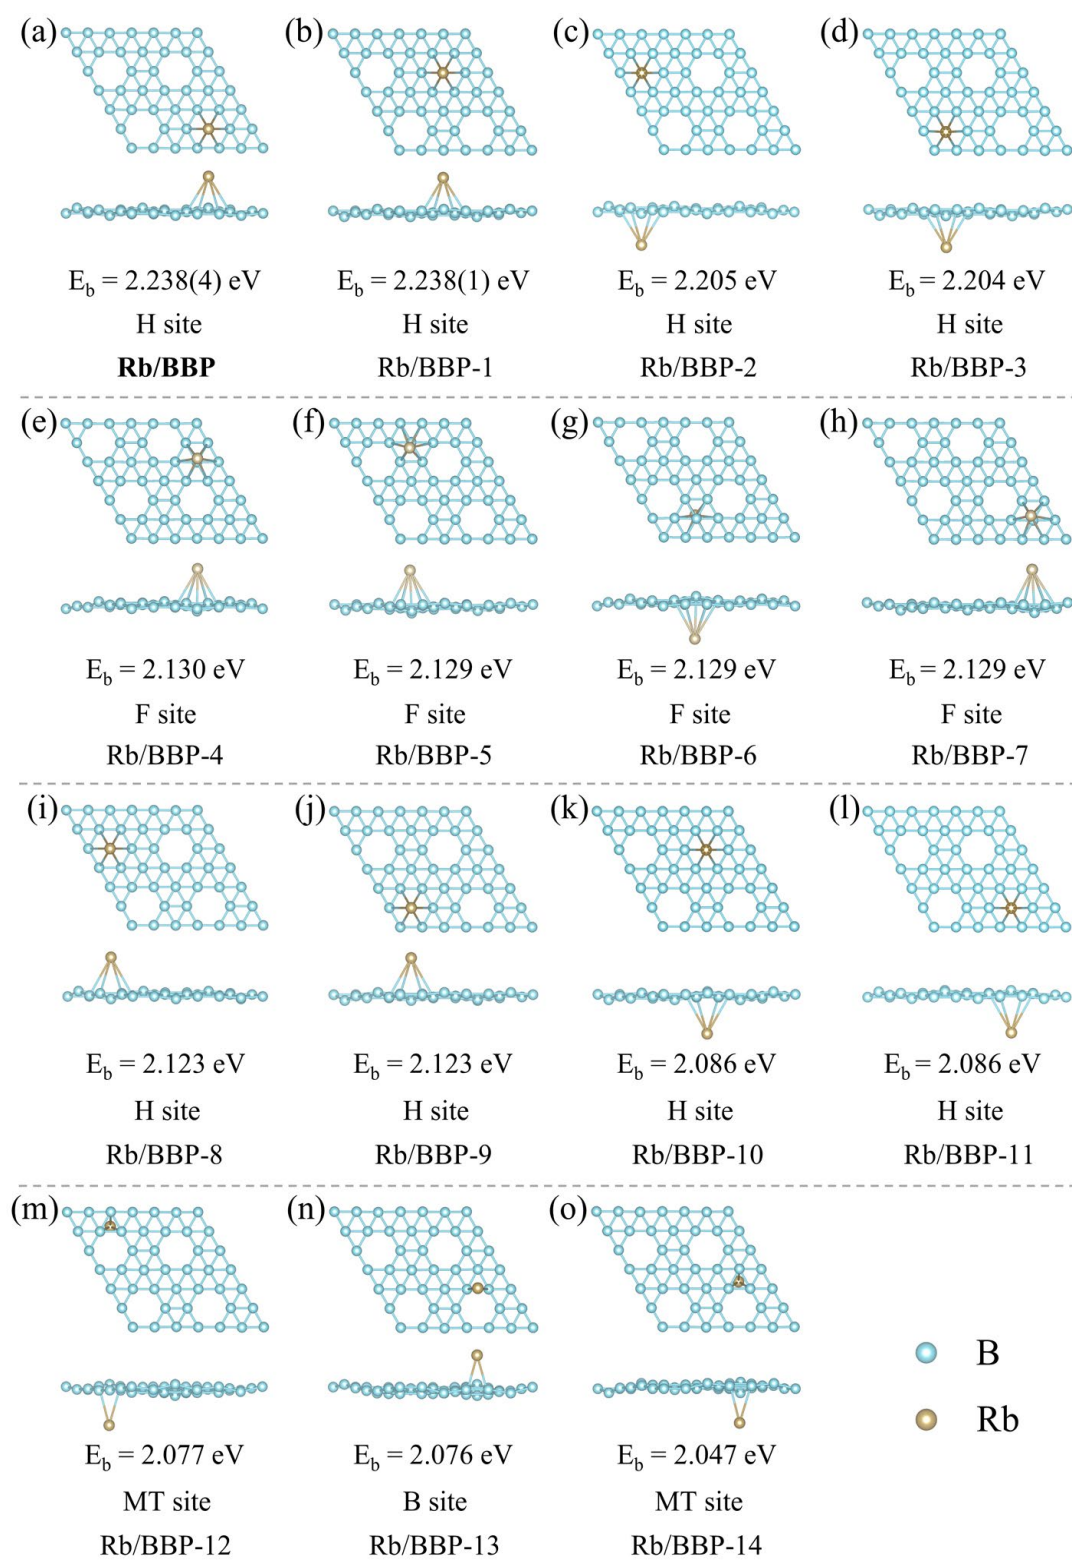

**Fig. S5** Optimized BBP structures containing one rubidium atom.

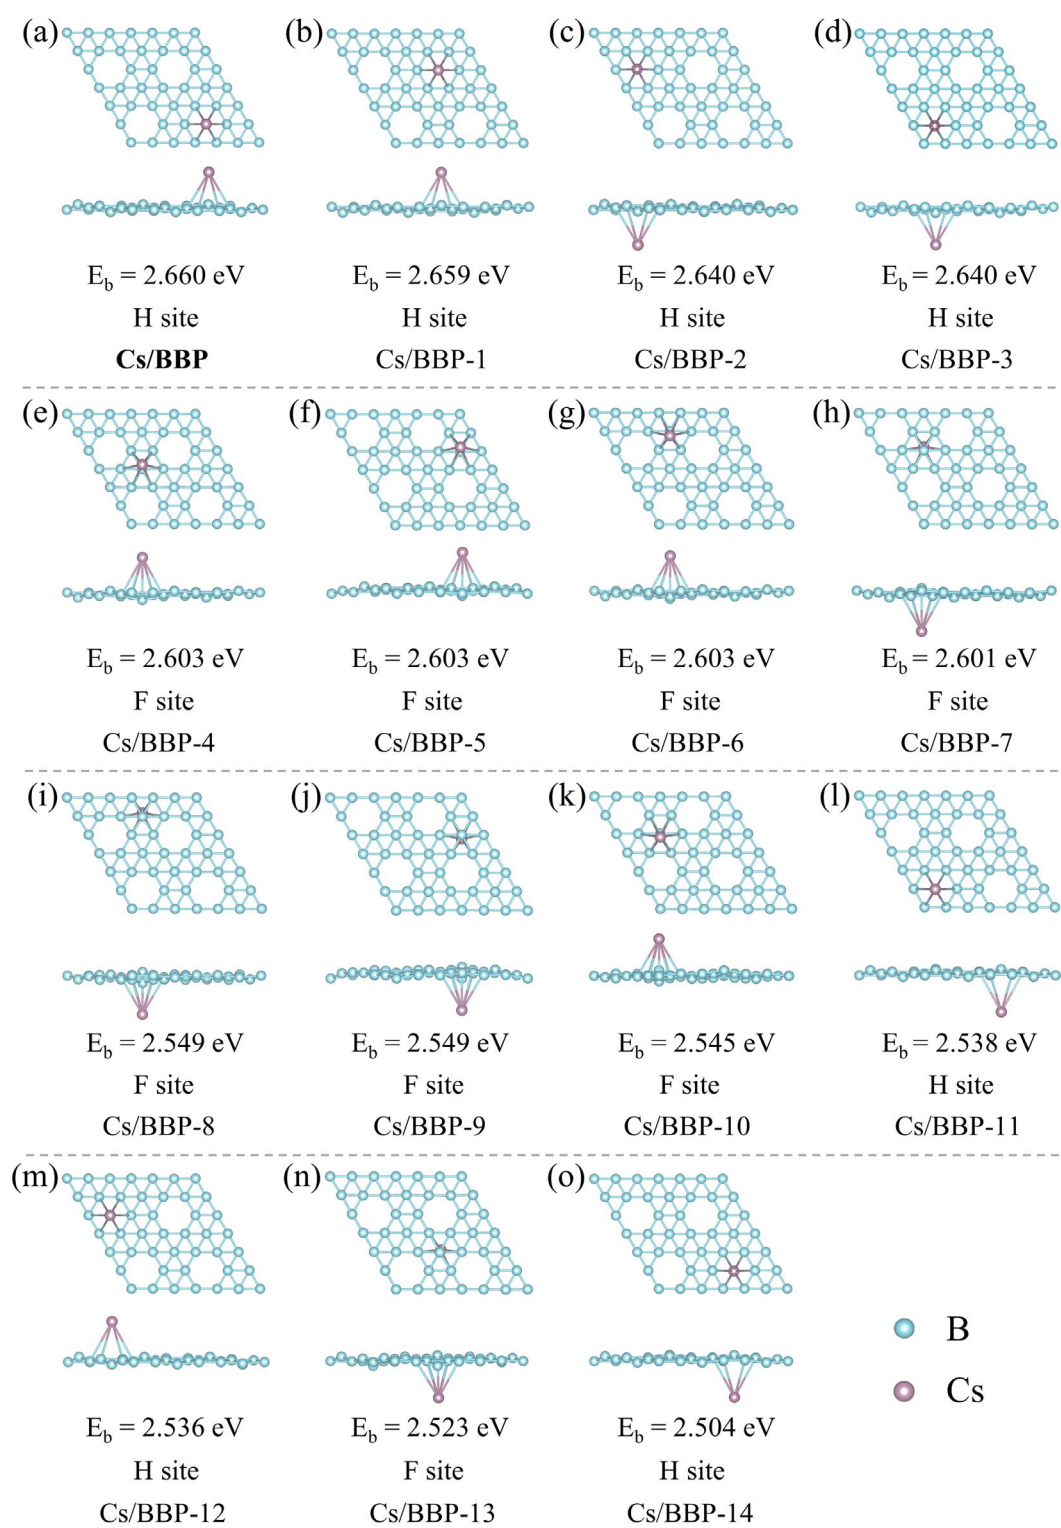

**Fig. S6** Optimized BBP structures containing one caesium atom.

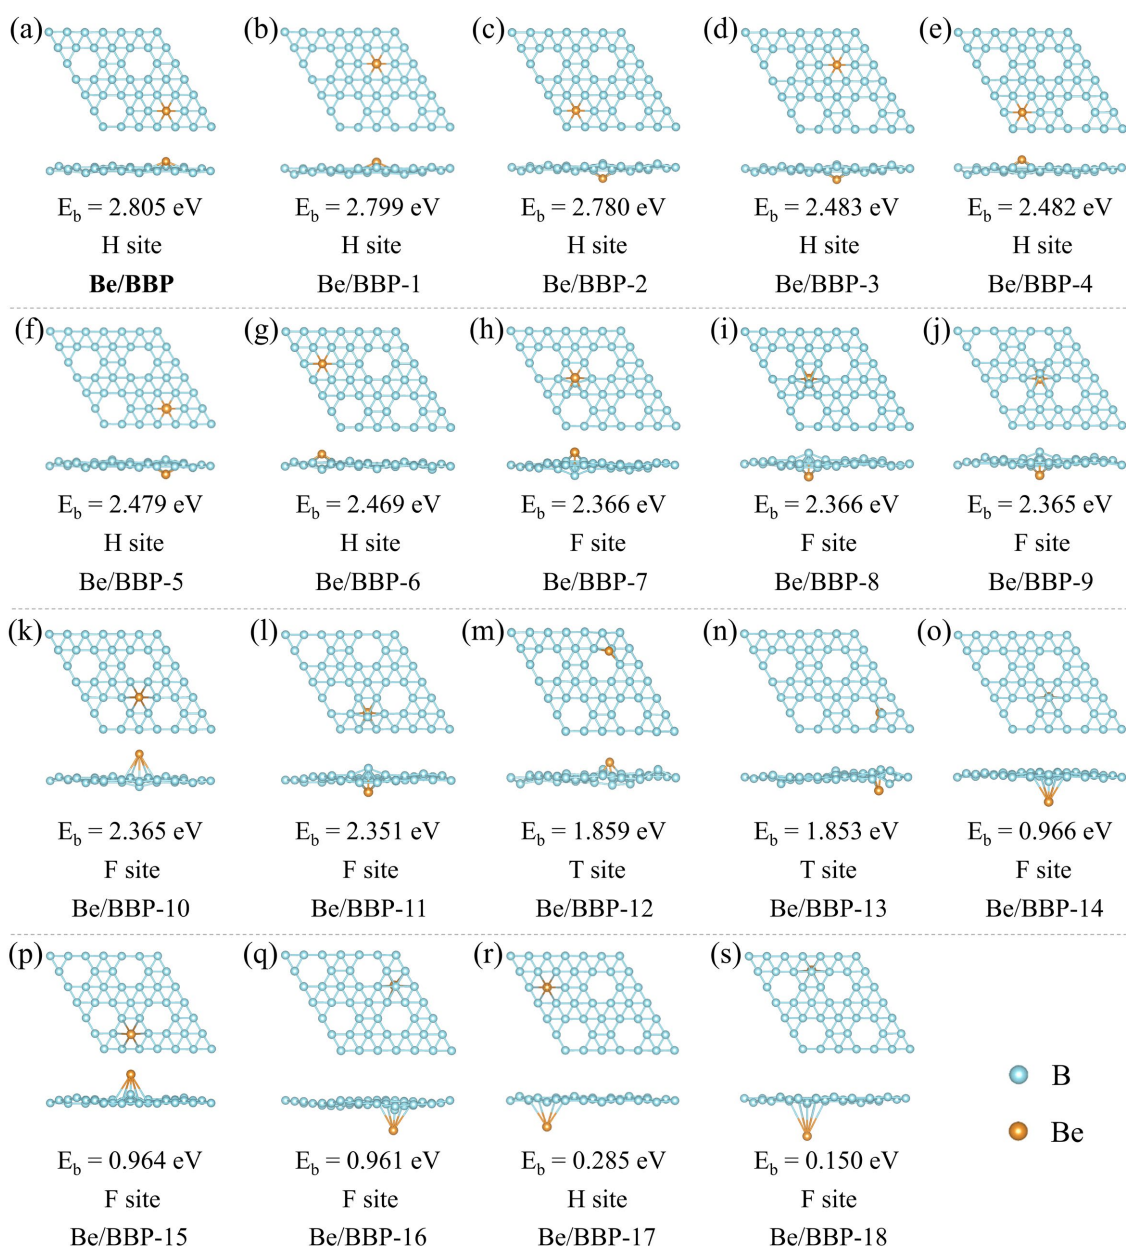

**Fig. S7** Optimized BBP structures containing one beryllium atom.

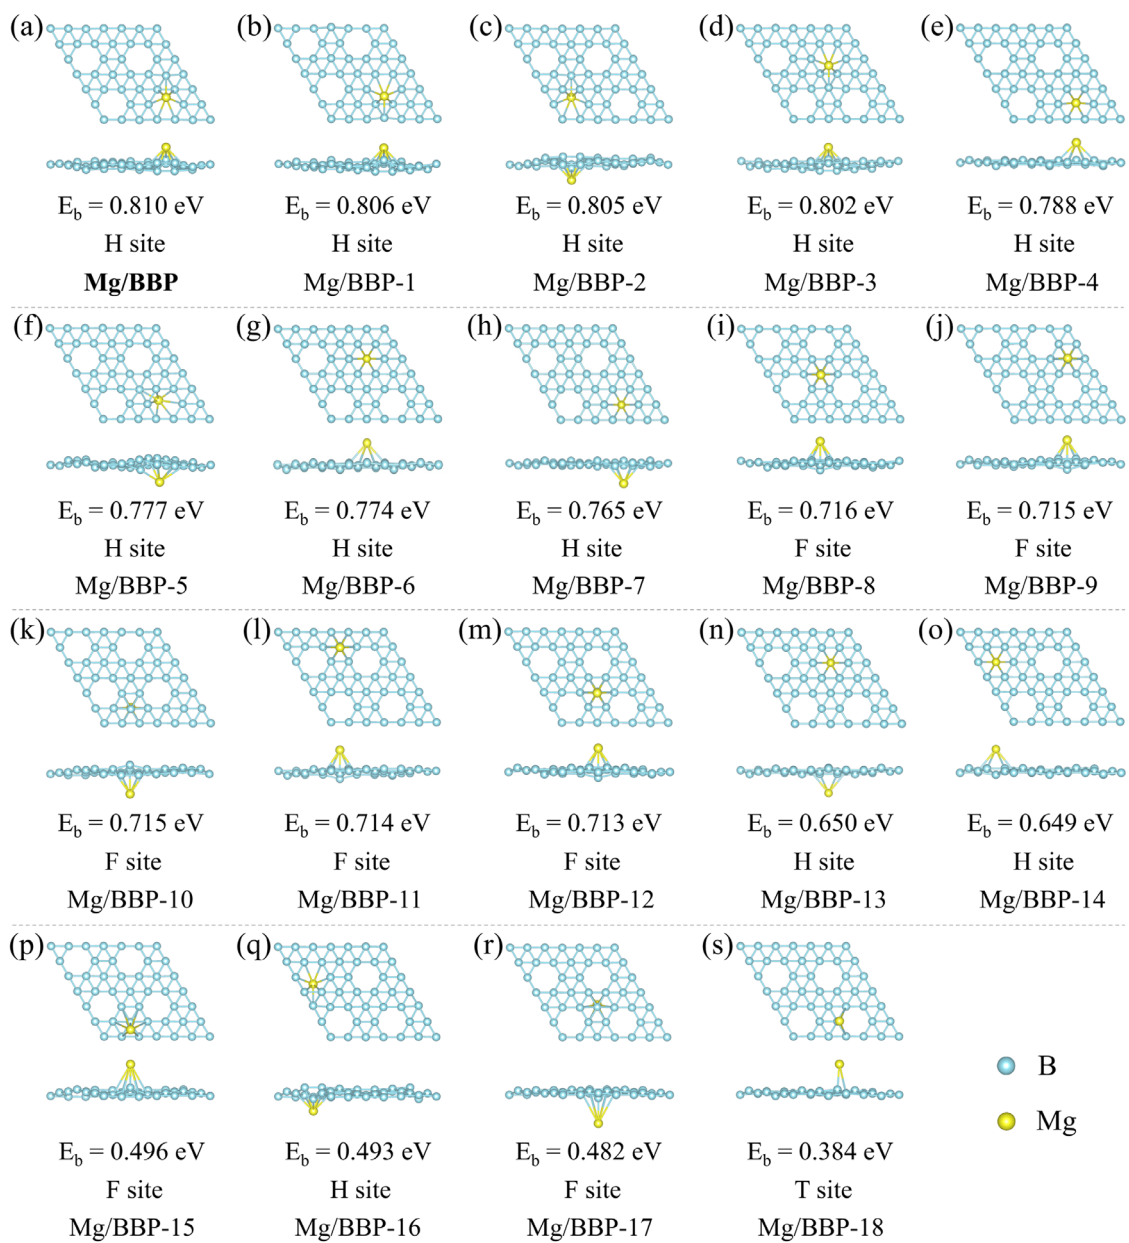

**Fig. S8** Optimized BBP structures containing one magnesium atom.



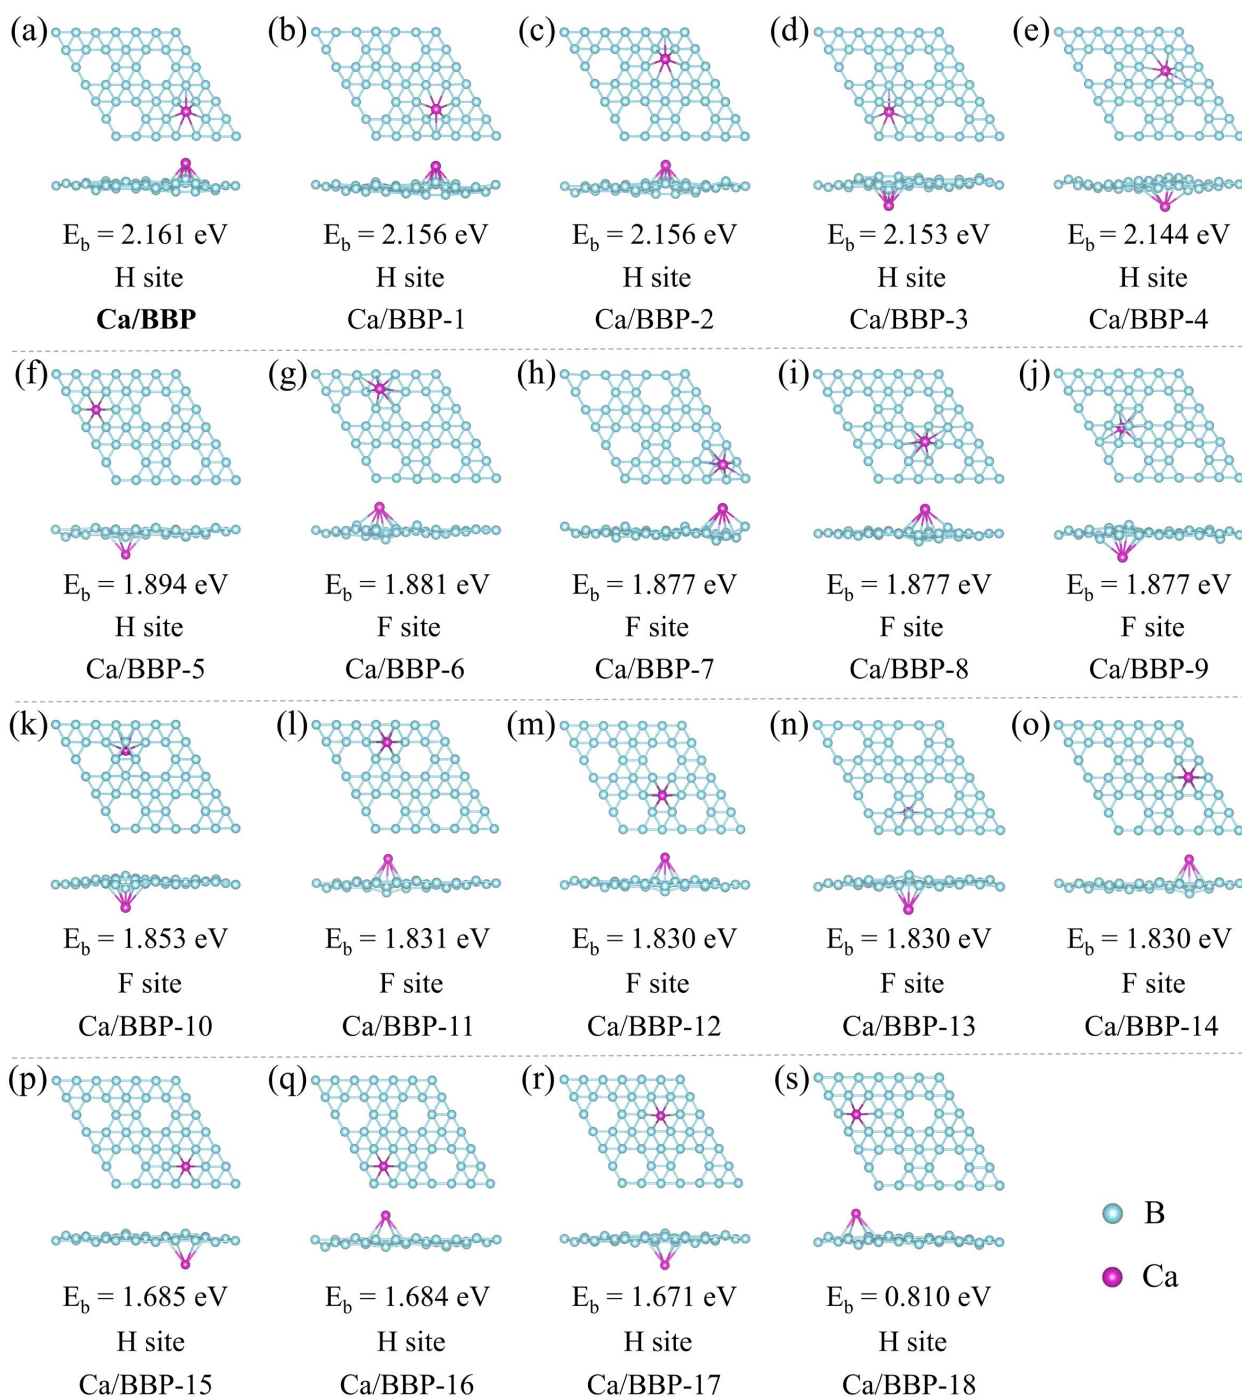

**Fig. S9** Optimized BBP structures containing one calcium atom.



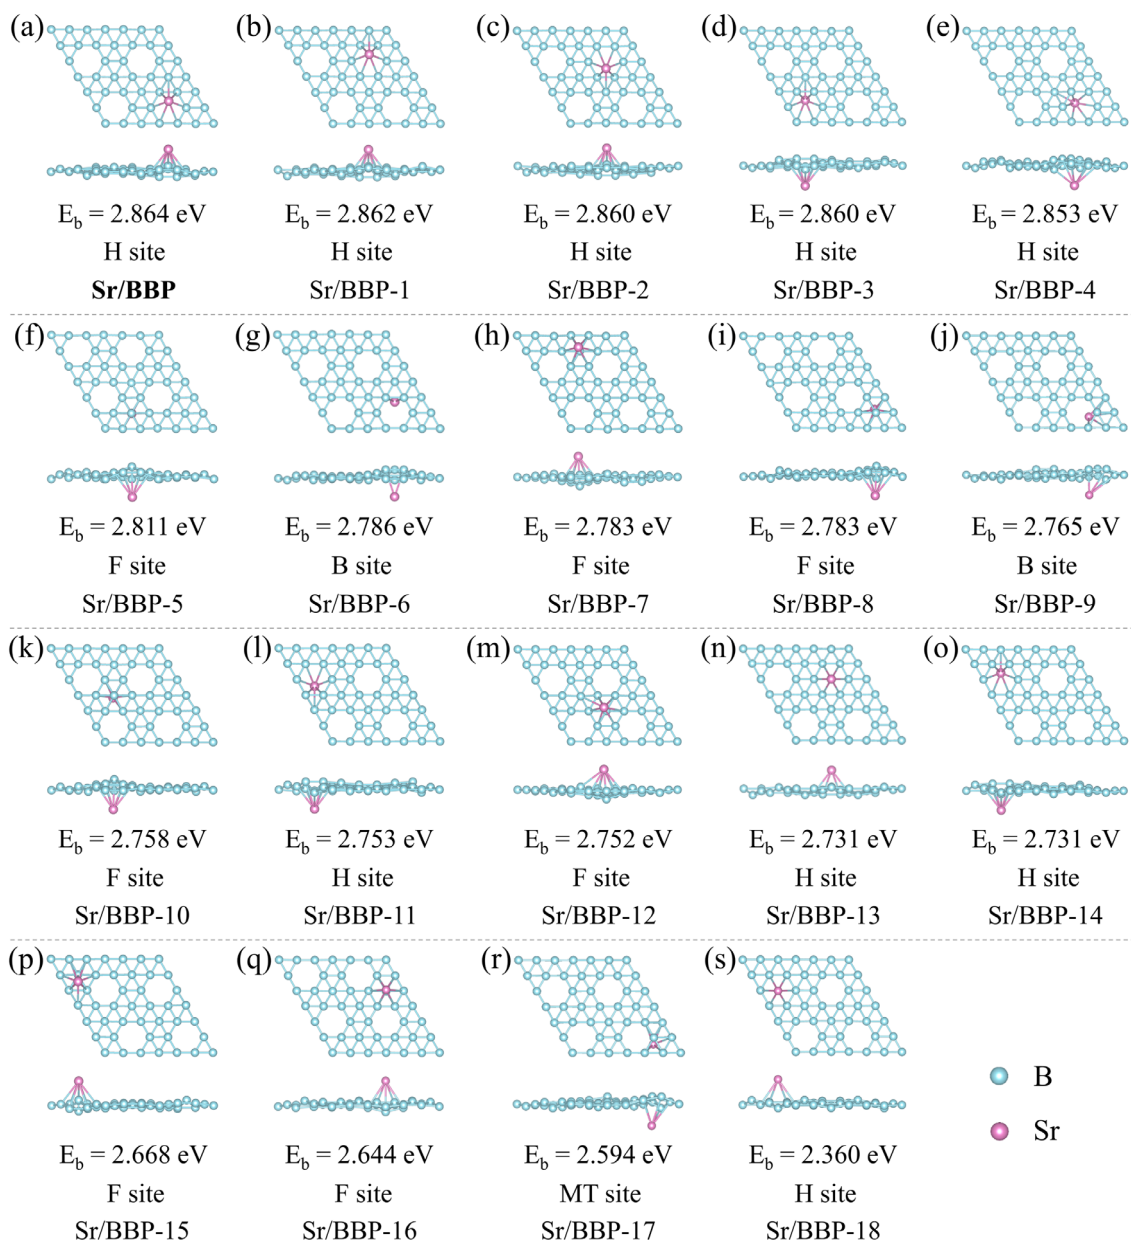

**Fig. S10** Optimized BBP structures containing one strontium atom.

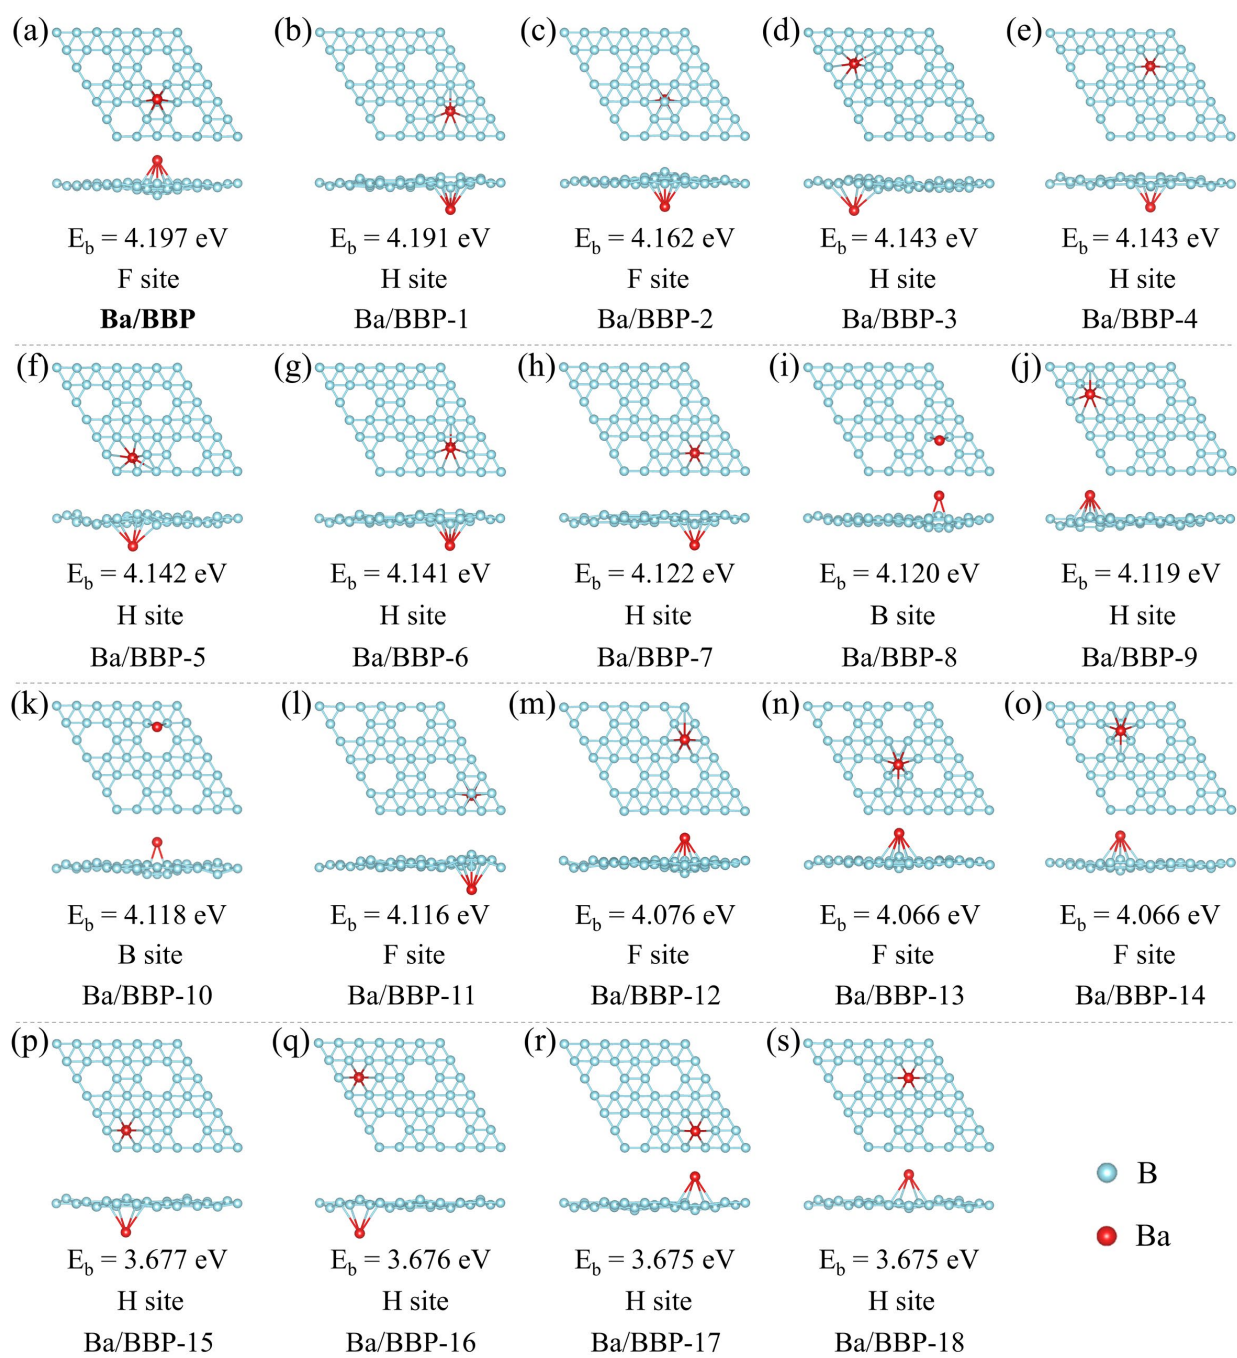

**Fig. S11** Optimized BBP structures containing one barium atom.

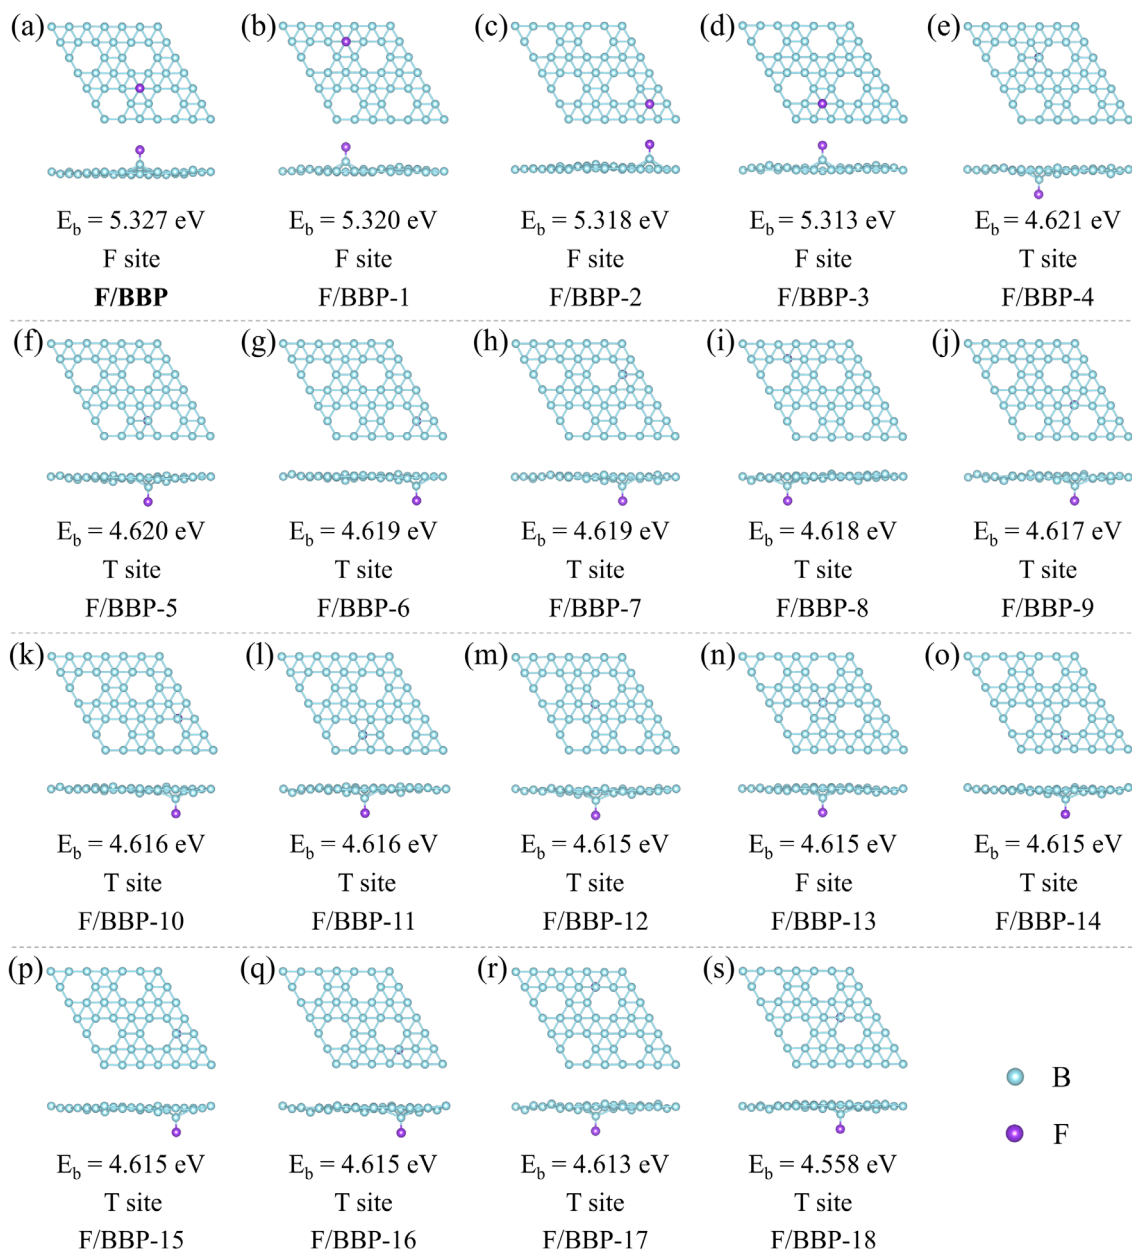

**Fig. S12** Optimized BBP structures containing one fluorine atom.

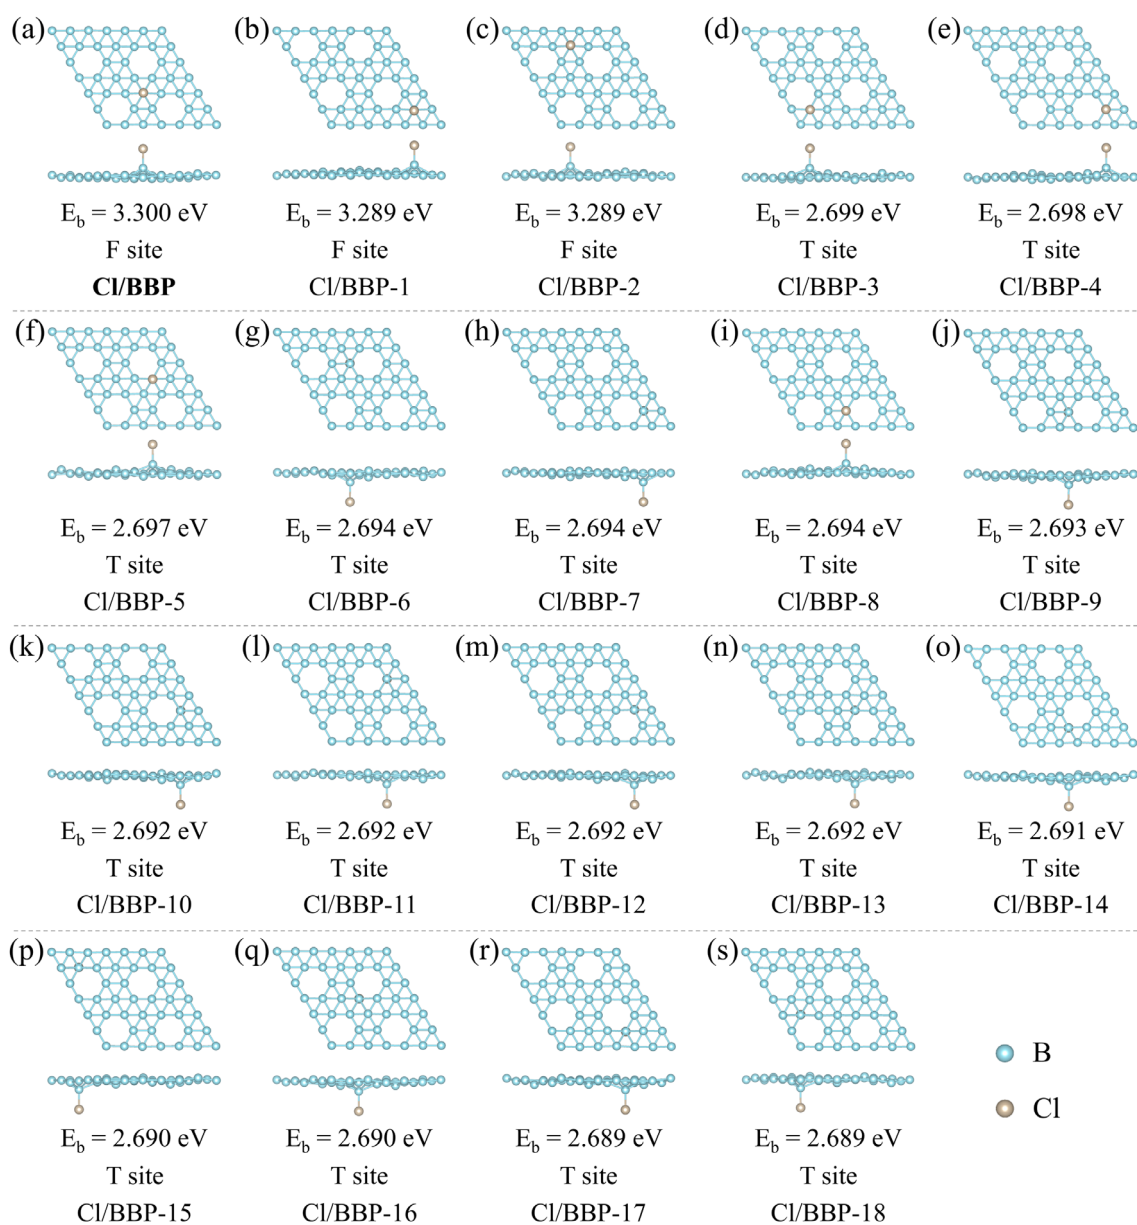

**Fig. S13** Optimized BBP structures containing one chlorine atom.

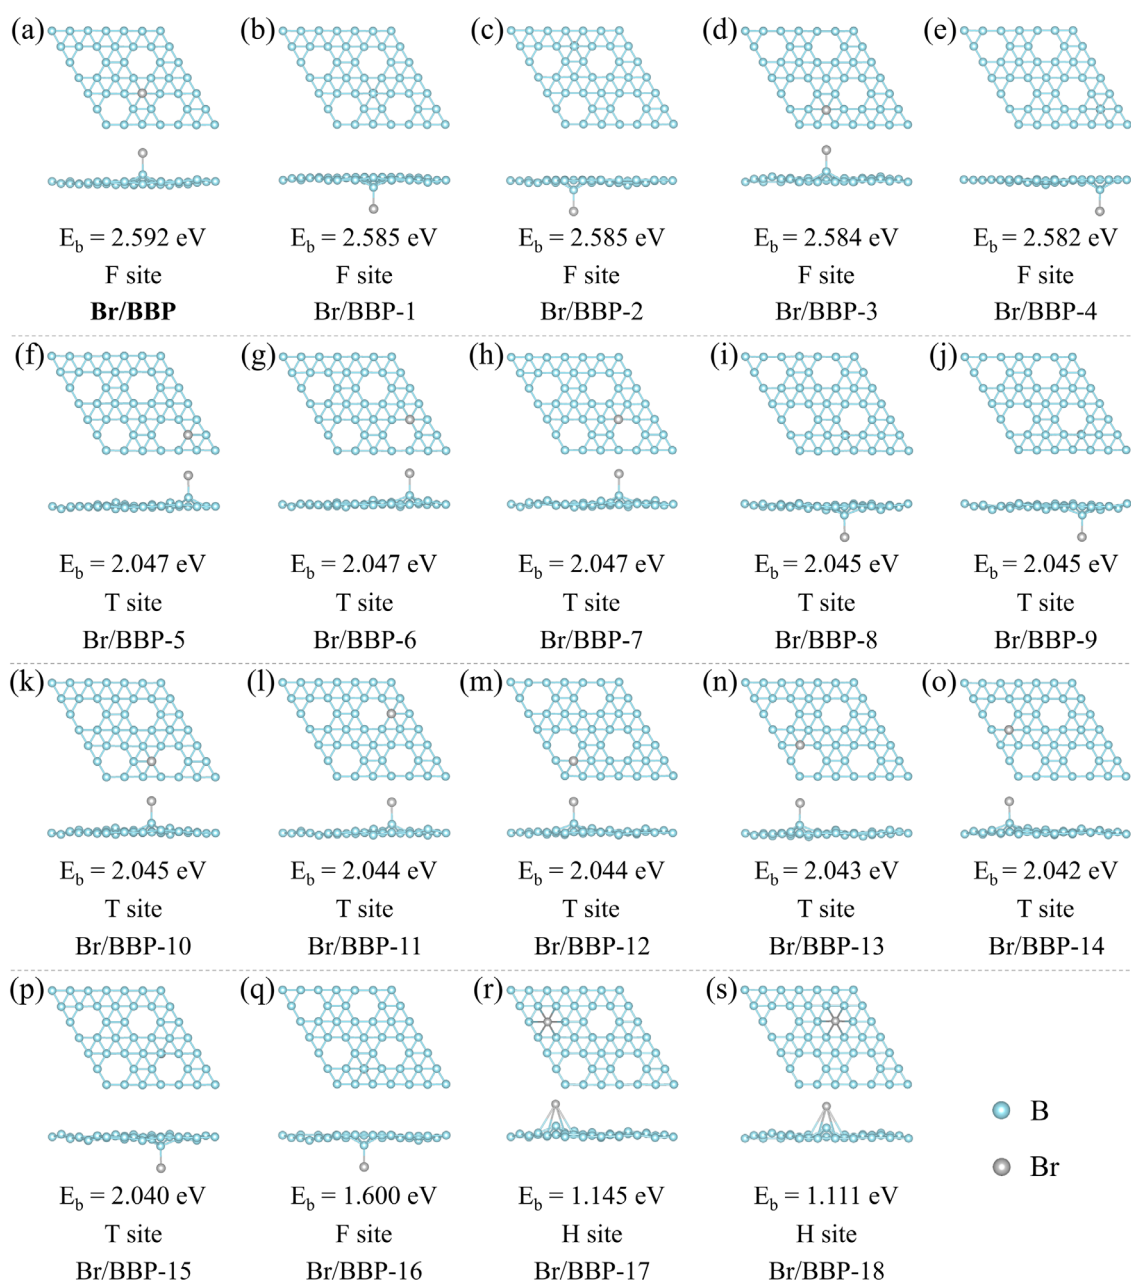

**Fig. S14** Optimized BBP structures containing one bromine atom.



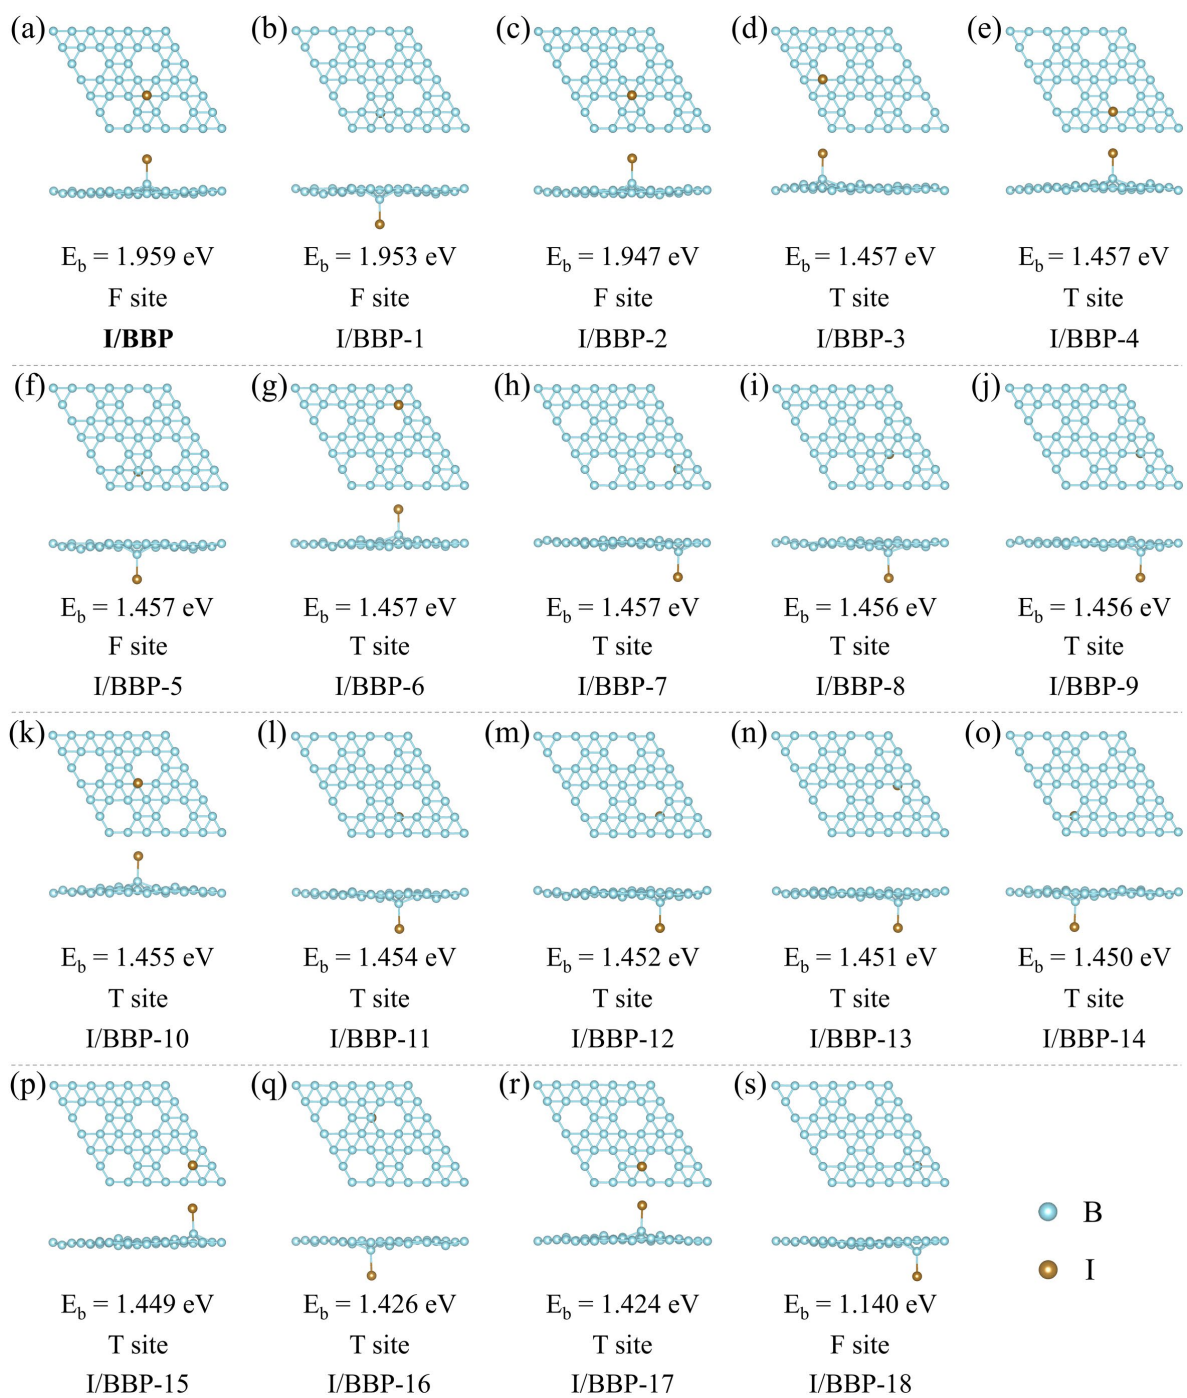

**Fig. S15** Optimized BBP structures containing one iodine atom.

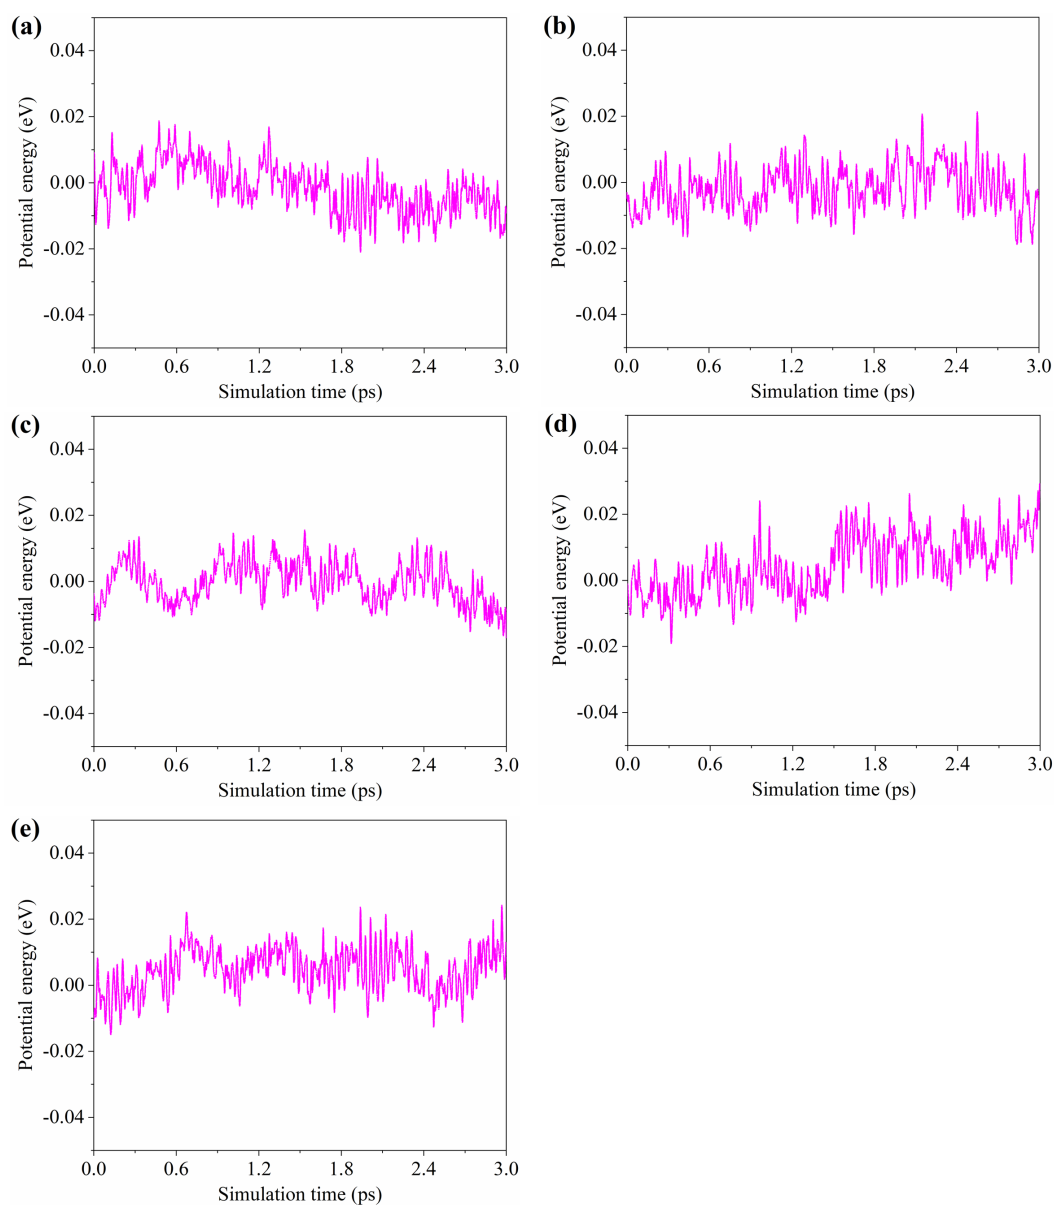

**Fig. S16** Constant-T simulation of alkali metal/BBP using the Nosé-Hoover chain thermostat, with a time step of 1.5 fs, target temperature of 300 K, and nose Q ratio of 2.0. (a)–(e) show the potential energies of Li/BBP, Na/BBP, K/BBP, Rb/BBP, and Cs/BBP at each time step of the simulation within 3 ps, respectively.

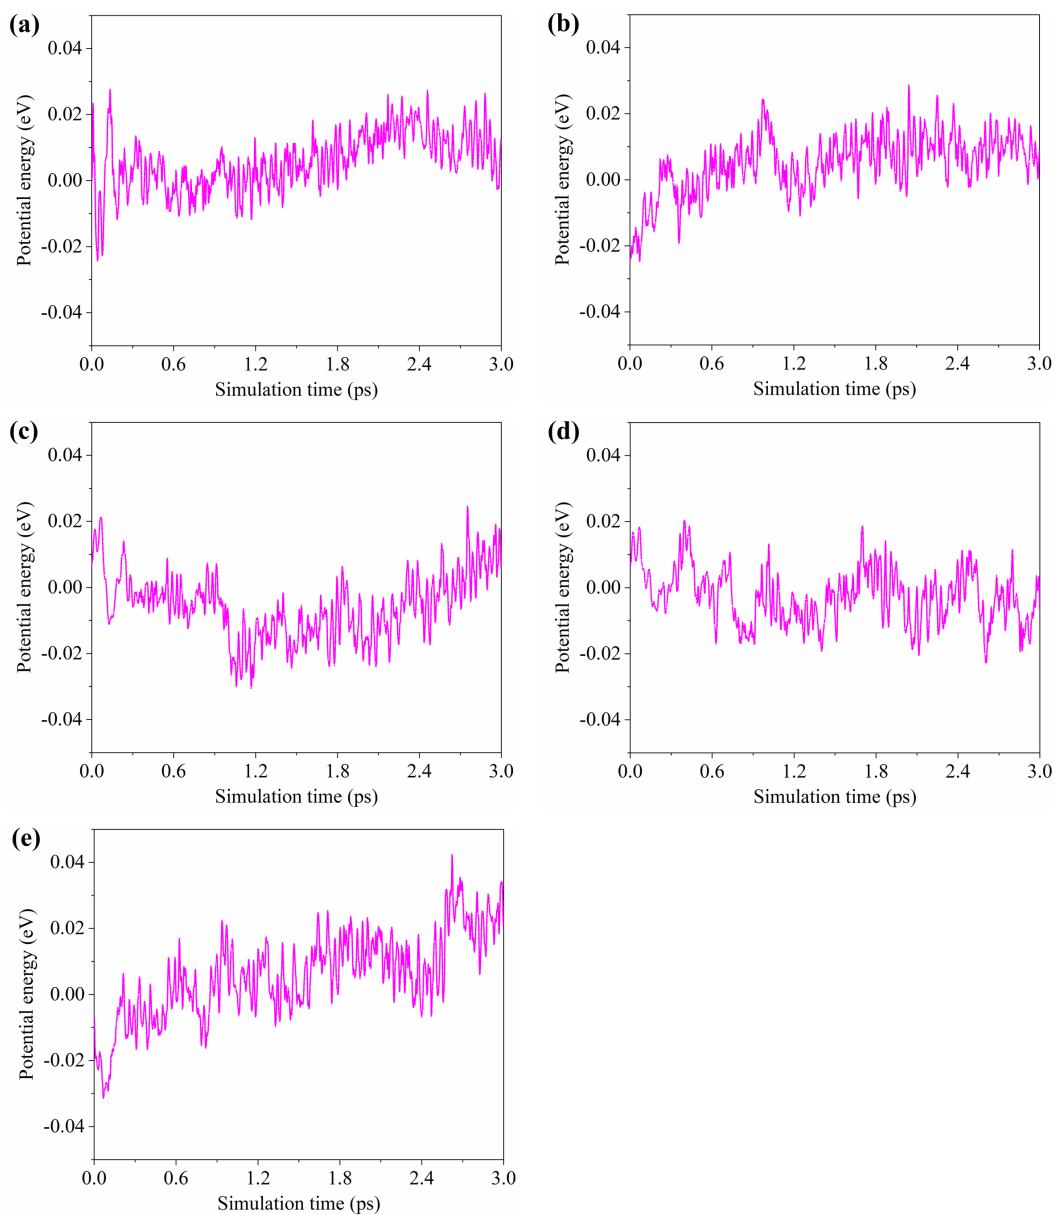

**Fig. S17** Constant-T simulation of alkaline earth metal/BBP using the Nosé-Hoover chain thermostat, with a time step of 1.5 fs, target temperature of 300 K, and nose Q ratio of 2.0. (a)–(e) show the potential energies of Be/BBP, Mg/BBP, Ca/BBP, Sr/BBP, and Ba/BBP at each time step of the simulation within 3 ps, respectively.



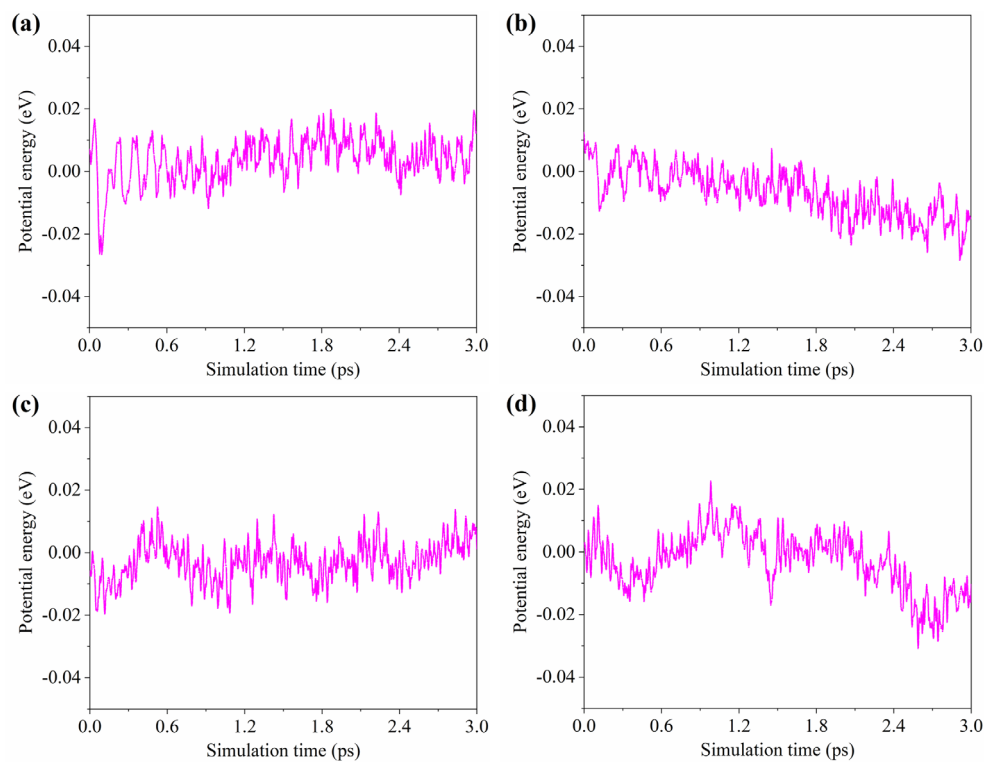

**Fig. S18** Constant-T simulation of halogen/BBP using the Nosé-Hoover chain thermostat, with a time step of 1.5 fs, target temperature of 300 K, and nose Q ratio of 2.0. (a)–(d) show the potential energies of F/BBP, Cl/BBP, Br/BBP, and I/BBP at each time step of the simulation within 3 ps, respectively.

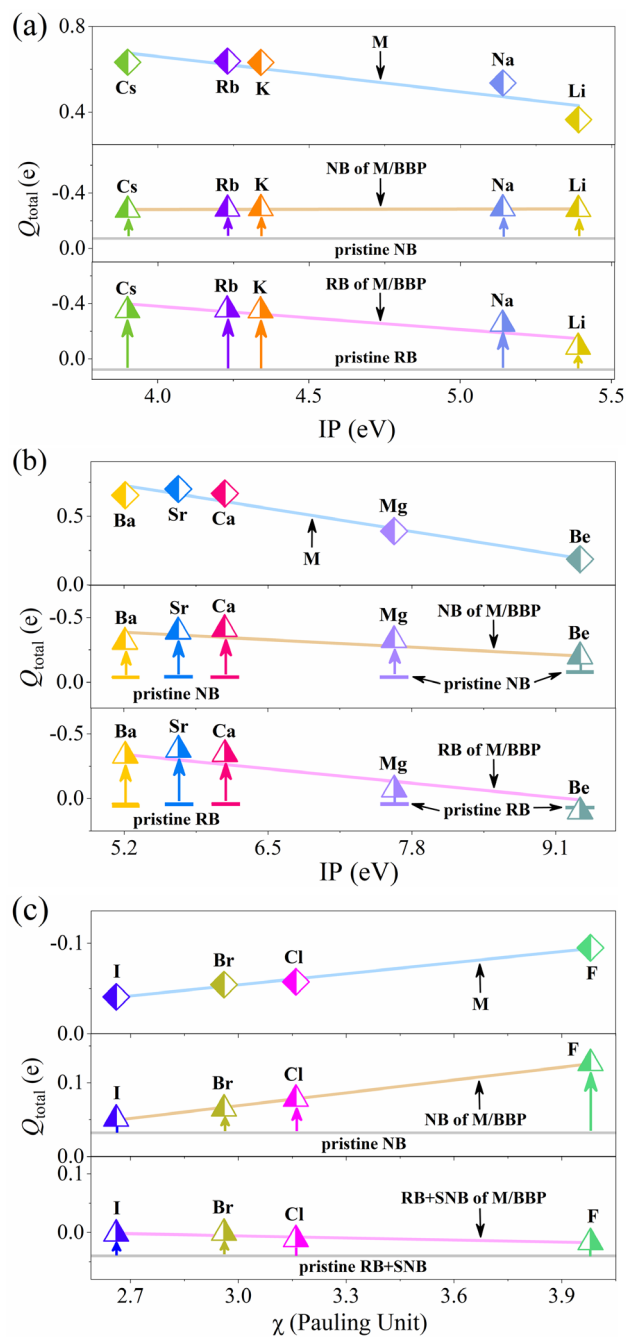

**Fig. S19** Hirshfeld charges of adatom (M), NB, and RB in (a) alkali metal/BBP and (b) alkaline earth metal/BBP as a function of ionization potential (IP). (c) Hirshfeld charges of M, NB, and the sum of RB and SNB (RB+SNB) in halogen/BBP as a function of electronegativity ( $\chi$ ).

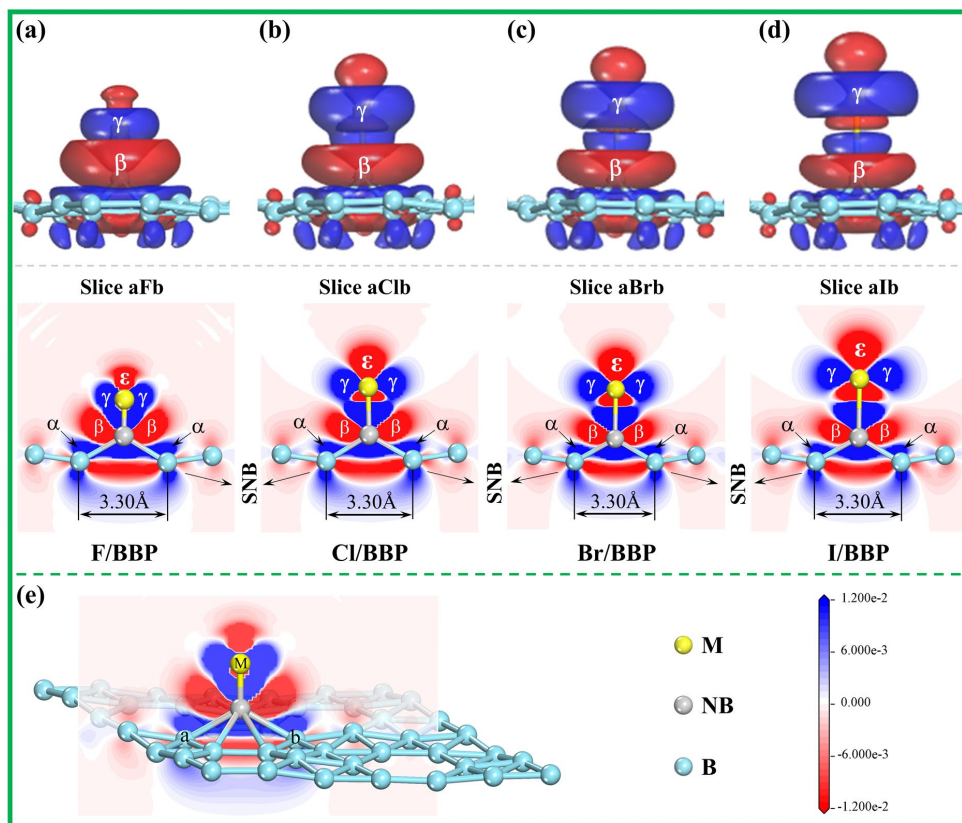

**Fig. S20** Electron density differences ( $\Delta\rho$ ) for (a) F/BBP, (b) Cl/BBP, (c) Br/BBP, (d) I/BBP, and (e) diagram of M and two boron atoms used to determine the indicated slice aMb. SNB represents the sub-neighboring boron of M/BBP. The 3D side-view electron density differences are shown on the surface at an electron density isovalue of  $0.008 \text{ e/A}^3$  within the given color scale. The  $\Delta\rho$  is defined as  $\Delta\rho = \rho(\text{M/BBP}) - \rho(\text{M}) - \rho(\text{BBP})$ , where  $\rho(\text{M/BBP})$ ,  $\rho(\text{M})$ , and  $\rho(\text{BBP})$  represent the electron densities of M/BBP, free M adatoms, and BBP, respectively. The blue and red regions indicate electron accumulation and depletion, respectively. The yellow, gray, and cyan spheres represent adatoms, neighboring borons (NBs) and boron atoms other than NBs (RBs), respectively.

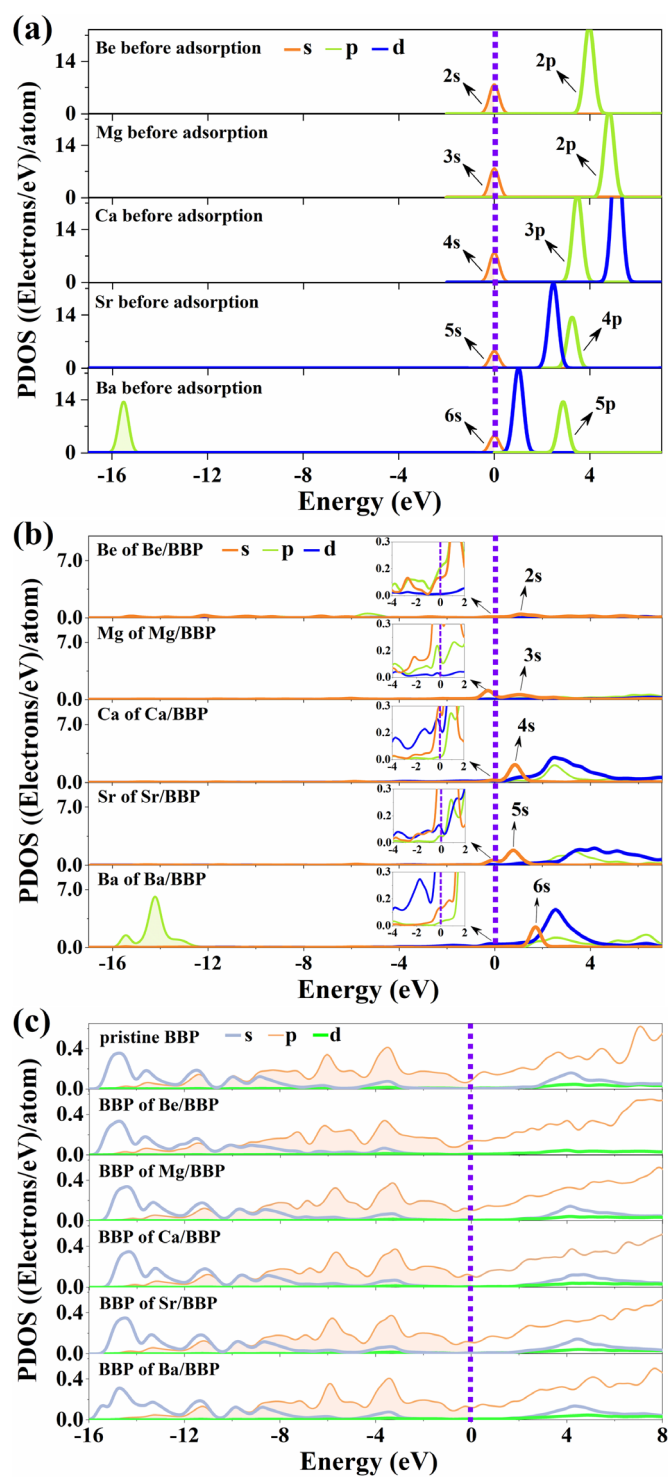

**Fig. S21** (a) PDOSs of the s, p, and d orbitals of alkaline earth metal atoms before adsorption. (b) PDOSs of the s, p, and d orbitals of alkaline earth metal atoms after adsorption. (c) PDOSs of the s, p, and d orbitals of boron atoms of alkaline earth metal/BBP before and after adsorption.

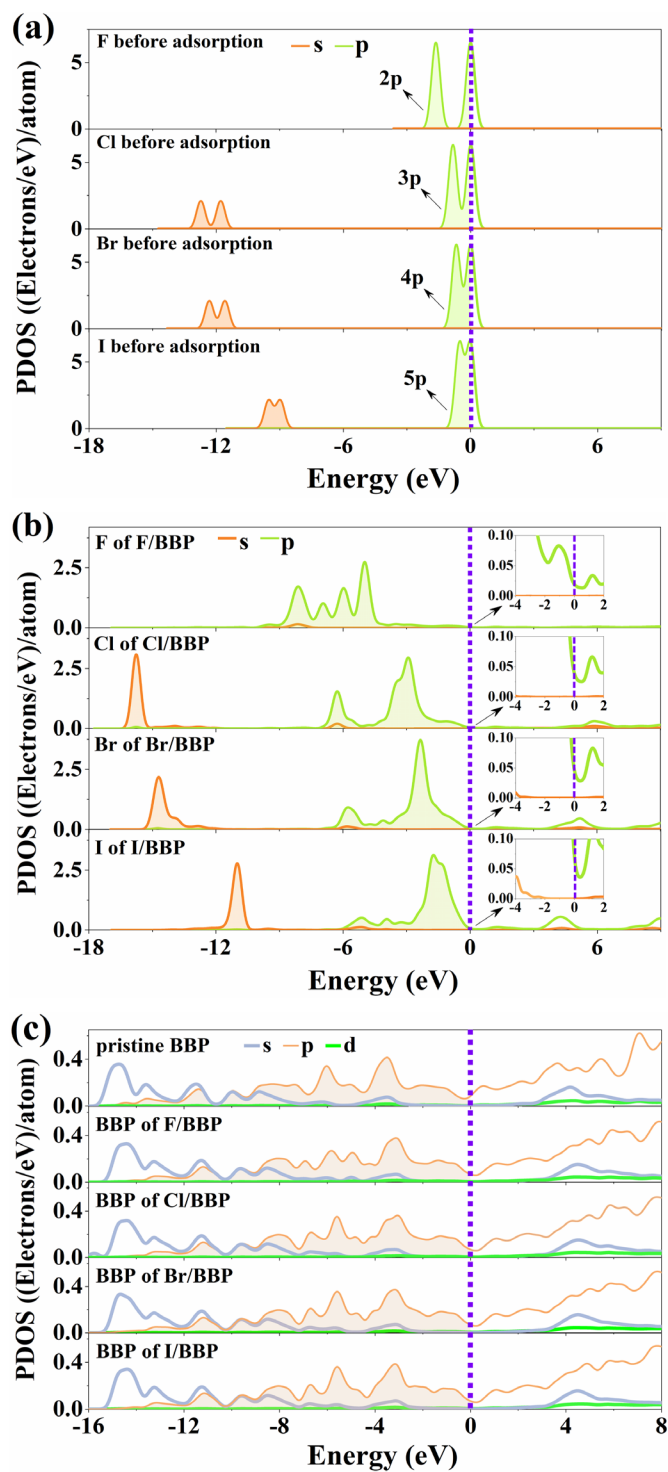

**Fig. S22** (a) PDOSs of the s, p, and d orbitals of halogen atoms before adsorption. (b) PDOSs of the s, p and, d orbitals of halogen atoms after adsorption. (c) PDOSs of the s, p, and d orbitals of boron atoms of halogen/BBP before and after adsorption.

## References

1. K. T. Chan, J. B. Neaton and M. L. Cohen, *Phys. Rev. B*, 2008, **77**, 235430.
2. M. Legesse, F. E. Mellouhi, E. T. Bentría, M. E. Madjet, T. S. Fisher, S. Kais and F. H. Alharbi, *Appl. Surf. Sci.*, 2017, **394**, 98–107.
3. M. Legesse, S. N. Rashkeev, F. Al-Dirini and F. H. Alharbi, *Appl. Surf. Sci.*, 2020, **509**, 144893.
4. P. D. Taylor, D. A. Osborne, S. A. Tawfik, T. Morishita and M. J. S. Spencer, *Phys. Chem. Chem. Phys.*, 2019, **21**, 7165–7173.
5. J. H. Hao, Z. J. Wang, Y. F. Wang, Y. H. Yin, R. Jiang and Q. H. Jin, *Solid State Sci.*, 2015, **50**, 69–73.
6. B. Zheng, H. T. Yu, Y. Xie and Y. F. Lian, *ACS Appl. Mater. Interfaces*, 2014, **6**, 19690–19701.
7. Y. Y. Deng, Y. Y. Qian, Y. Xie, L. Zhang, B. Zheng, Y. Q. Lou and H. T. Yu, *Acta Chim. Sin.*, 2020, **78**, 344–354.
8. T. Yi, B. Zheng, H. Yu and Y. Xie, *Chem. Res. Chin. Univ.*, 2017, **33**, 631–637.
9. B. Zheng, Y. Xie, Y. Y. Deng, Z. Q. Wang, Y. Q. Lou, Y. Y. Qian, J. He and H. T. Yu, *Adv. Theory Simul.*, 2020, **4**, 1900249.
10. Y. Y. Qian, B. Zheng, Y. Xie, J. He, J. M. Chen, L. Yang, X. Lu and H. T. Yu, *Langmuir*, 2021, **37**, 11027–11040.
11. A. A. Kistanov, Y. Cai, K. Zhou, N. Srikanth, S. V. Dmitriev and Y. W. Zhang, *Nanoscale*, 2018, **10**, 1403–1410.
12. S. S. Li, C. W. Zhang, W. X. Ji, F. Li, P. J. Wang, S. J. Hu, S. S. Yan and Y. S. Liu, *Phys. Chem. Chem. Phys.*, 2014, **16**, 15968–15978.
13. S. D. Sherpa, G. Levitin and D. W. Hess, *Appl. Phys. Lett.*, 2012, **101**, 111602.
14. H. Cho, S. Dae Kim, T. H. Han, I. Song, J. W. Byun, Y. H. Kim, S. Kwon, S. H. Bae, H. Cheul Choi, J. H. Ahn and T. W. Lee, *2D Mater.*, 2014, **2**, 014002.
15. B. Mortazavi, A. Dianat, O. Rahaman, G. Cuniberti and T. Rabczuk, *J. Power Sources*, 2016, **329**, 456–461.
16. C. Ataca, E. Aktürk and S. Ciraci, *Phys. Rev. B*, 2009, **79**, 041406.
17. R. Pekoz, M. Konuk, M. E. Kilic and E. Durgun, *ACS Omega*, 2018, **3**, 1815–1822.
